# Supplementary material
Source: PubMed Central journal article supplement (PMC7811823)

## Supporting Information

### A Chemoenzymatic Synthon Strategy for Synthesizing *N*-Acetyl Analogs of *O*-Acetylated *N. meningitidis* W Capsular Polysaccharide Oligosaccharides

Riyao Li,<sup>a</sup> Anoopjit Singh Kooner,<sup>a</sup> Saddam M. Muthana,<sup>a,†</sup> Yue Yuan,<sup>a</sup> Hai Yu<sup>a</sup> and Xi Chen<sup>a,\*</sup>

<sup>a</sup>Department of Chemistry, University of California-Davis, One Shields Avenue, Davis, CA 95616, USA

<sup>†</sup>Department of Chemistry, Alfaisal University, Riyadh 11533, Kingdom of Saudi Arabia

\*Corresponding author. Tel: +1 530 754 6037; fax: +1 530 752 8995. E-mail address: [xiichen@ucdavis.edu](mailto:xiichen@ucdavis.edu) (X. Chen).

#### Table of Contents

|                                                                                                                                                                                                                                                                                                                     |        |
|---------------------------------------------------------------------------------------------------------------------------------------------------------------------------------------------------------------------------------------------------------------------------------------------------------------------|--------|
| <b>Figure S1.</b> Structures of monosaccharides ( <b>A</b> ) used in the two-step one-pot multienzyme (OPME) donor substrate specific studies for the $\alpha$ 2–6-sialyltransferase activity of NmSiaD <sub>W</sub> and the structures of the corresponding CMP-sialic acids ( <b>B</b> ).....                     | S2     |
| <b>Figure S2.</b> HSQC spectra comparison of <b>7N<sub>3</sub>-S3</b> and <b>S3</b> .....                                                                                                                                                                                                                           | S3     |
| <b>Figure S3.</b> HSQC spectra comparison of <b>9N<sub>3</sub>-S3</b> and <b>S3</b> .....                                                                                                                                                                                                                           | S3     |
| <sup>1</sup> H, <sup>13</sup> C, HSQC, and HSQC-TOCSY (90 ms and 10 ms) NMR spectra of NmW CPS oligosaccharides <b>7N<sub>3</sub>-S3</b> , <b>7NAc-S3</b> , <b>9N<sub>3</sub>-S3</b> , <b>9NAc-S3</b> , <b>7N<sub>3</sub>-G4</b> , <b>7NAc-G4<sub>c</sub></b> , <b>9N<sub>3</sub>-G4</b> , and <b>9NAc-G4</b> ..... | S4–S27 |

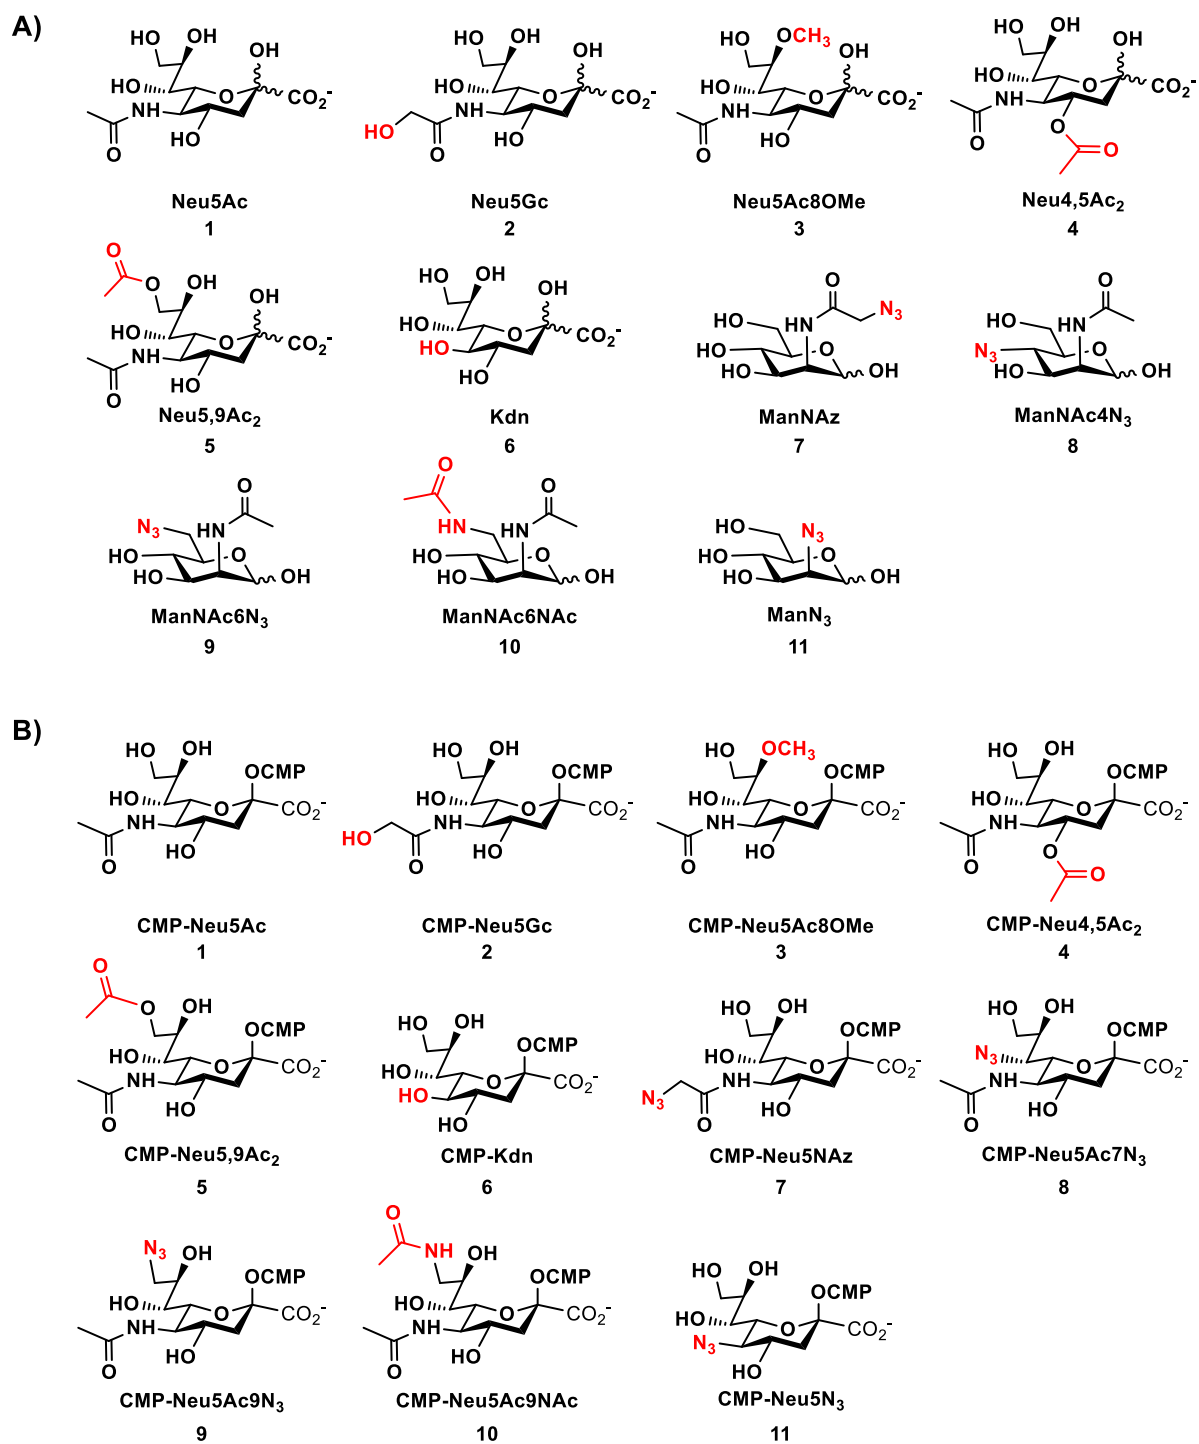

**Figure S1.** Structures of monosaccharides (A) that have been used in two-step one-pot multienzyme (OPME) donor substrate specific studies for the  $\alpha 2$ -6-sialyltransferase activity of NmSiaD<sub>W</sub> and the structures of the corresponding CMP-sialic acids (B). Galactosyl disaccharide **G2** was used as the acceptor substrate.

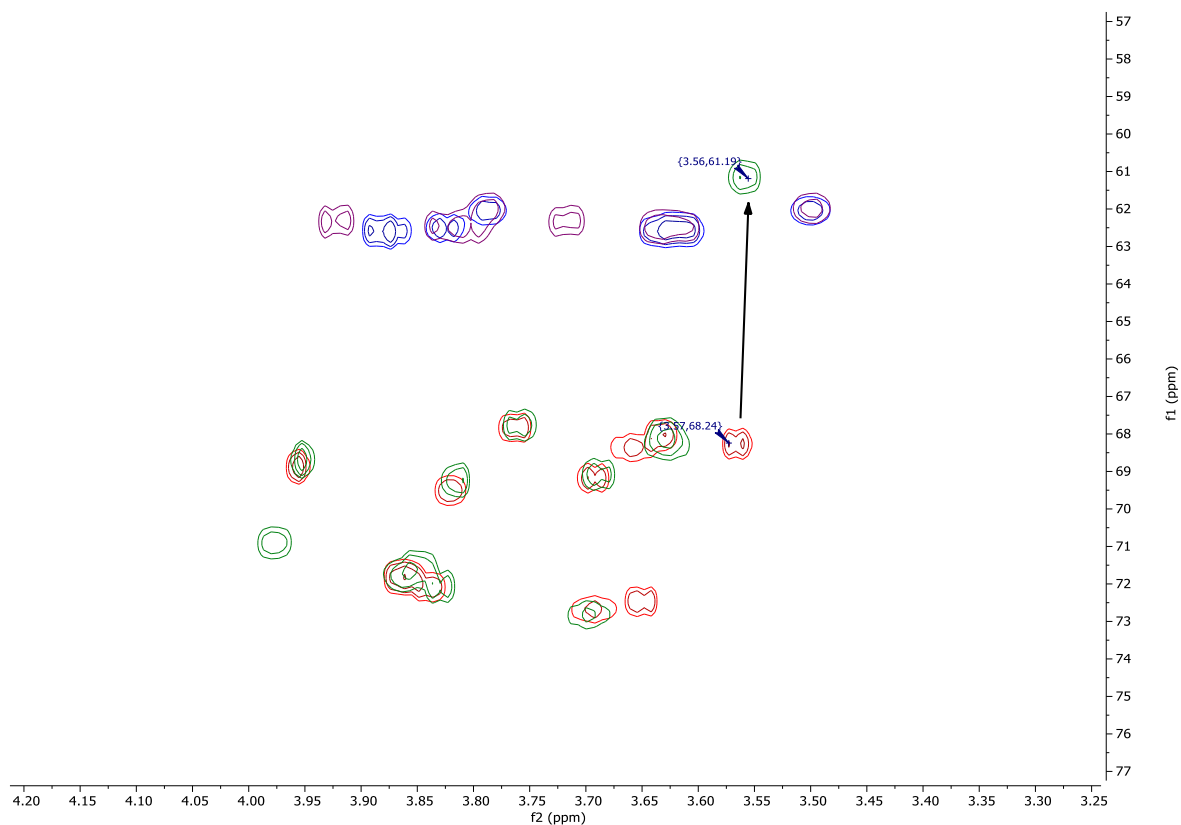

**Figure S2.** HSQC spectra comparison of the H<sup>'''</sup>-7 and C<sup>'''</sup>-7 in sialyltrisaccharides **7N<sub>3</sub>-S3** (green/purple) and **S3** (red/blue).

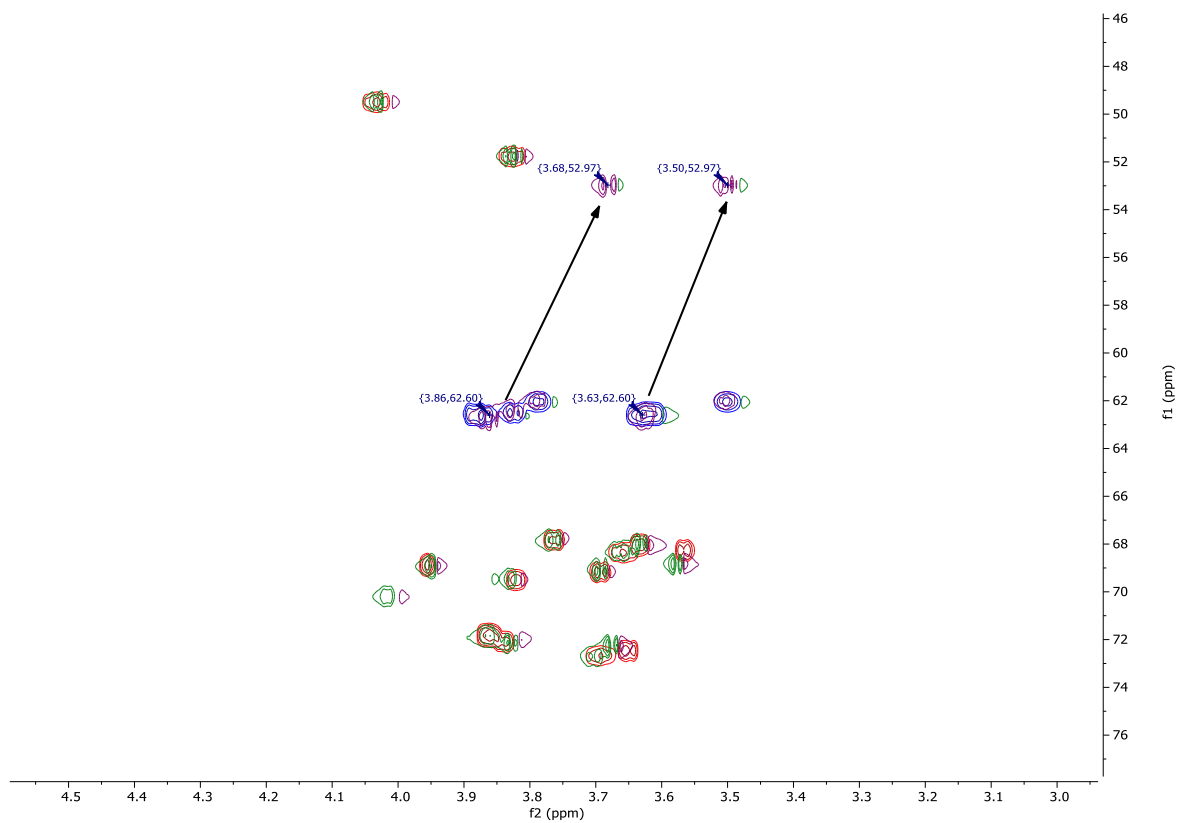

**Figure S3.** HSQC spectra comparison of the H<sup>'''</sup>-9 and C<sup>'''</sup>-9 in sialyltrisaccharides **9N<sub>3</sub>-S3** (green/purple) and **S3** (red/blue).

$^1\text{H}$  (800 MHz),  $^{13}\text{C}$  (200 MHz), HSQC (800 MHz), and HSQC-TOCSY (90 ms and 10 ms, 800 MHz) NMR spectra ( $\text{D}_2\text{O}$ ) of Neu5Ac7N $\alpha$ 2-6Gal $\alpha$ 1-4Neu5Ac $\alpha$ ProNHCBz (7N $\alpha$ 3-S3)

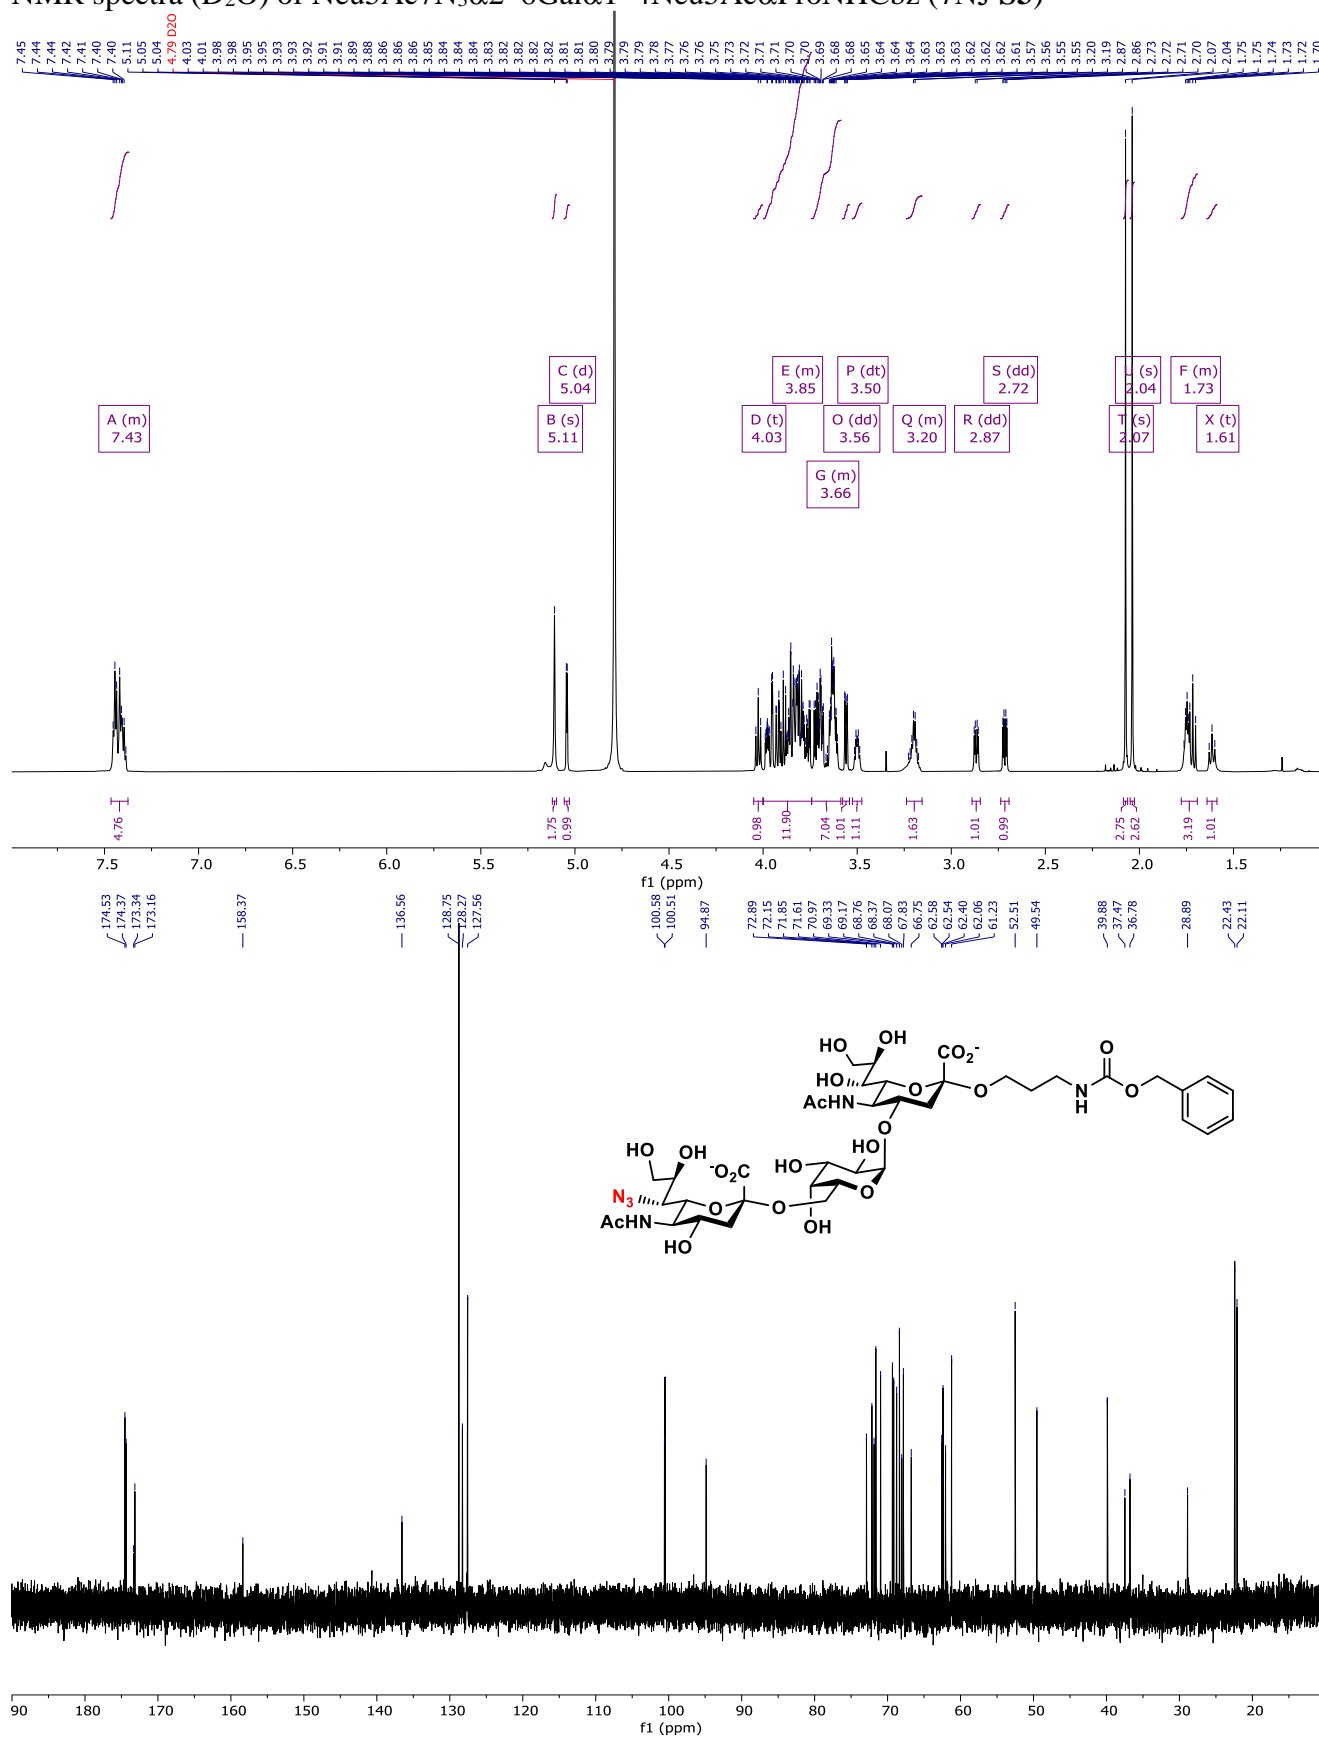

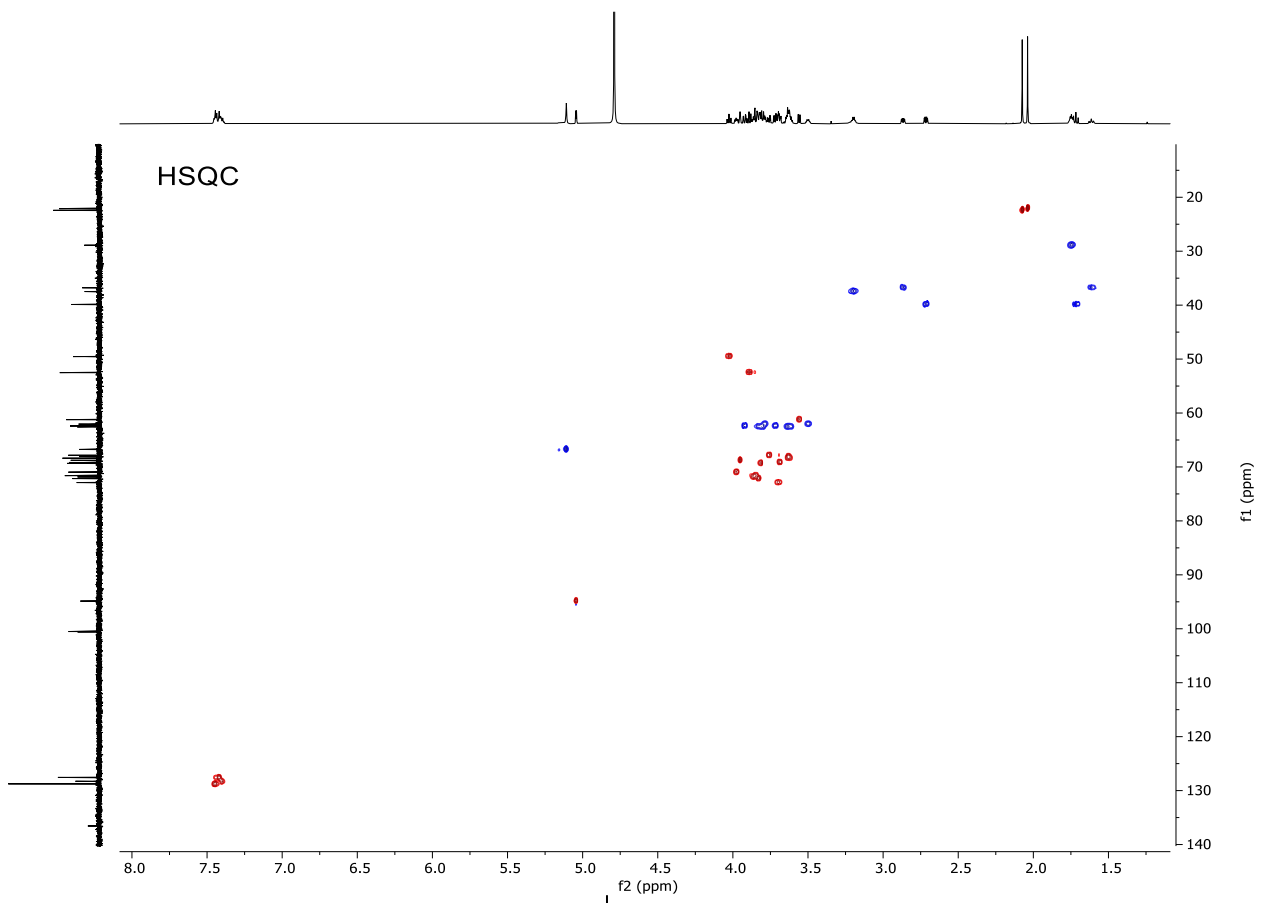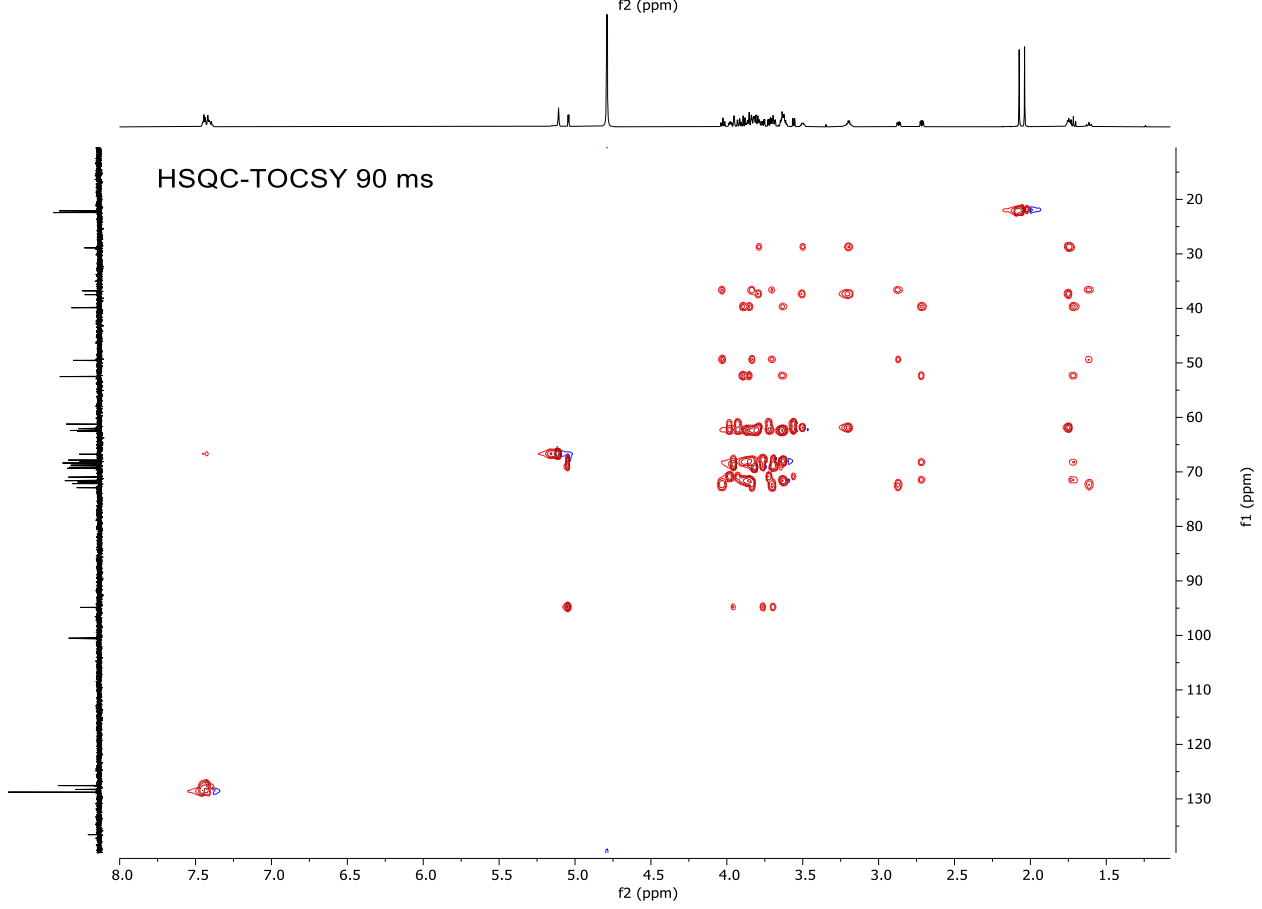

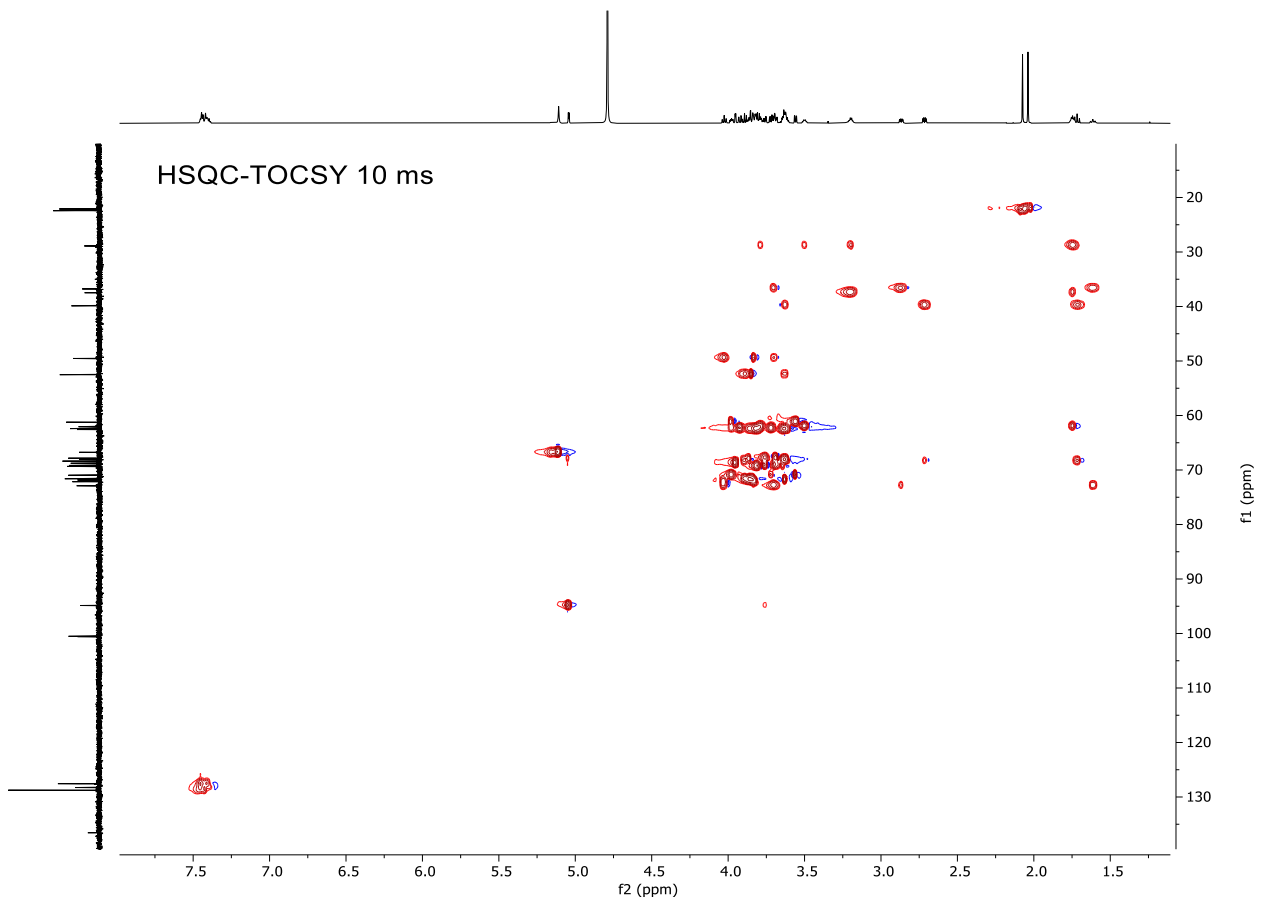

$^1\text{H}$  (800 MHz),  $^{13}\text{C}$  (200 MHz), HSQC (800 MHz), and HSQC-TOCSY (90 ms and 10 ms, 800 MHz) NMR spectra ( $\text{D}_2\text{O}$ ) of Neu5Ac7NAc $\alpha$ 2-6Gal $\alpha$ 1-4Neu5Ac $\alpha$ ProNHcbz (**7NAc-S3**)

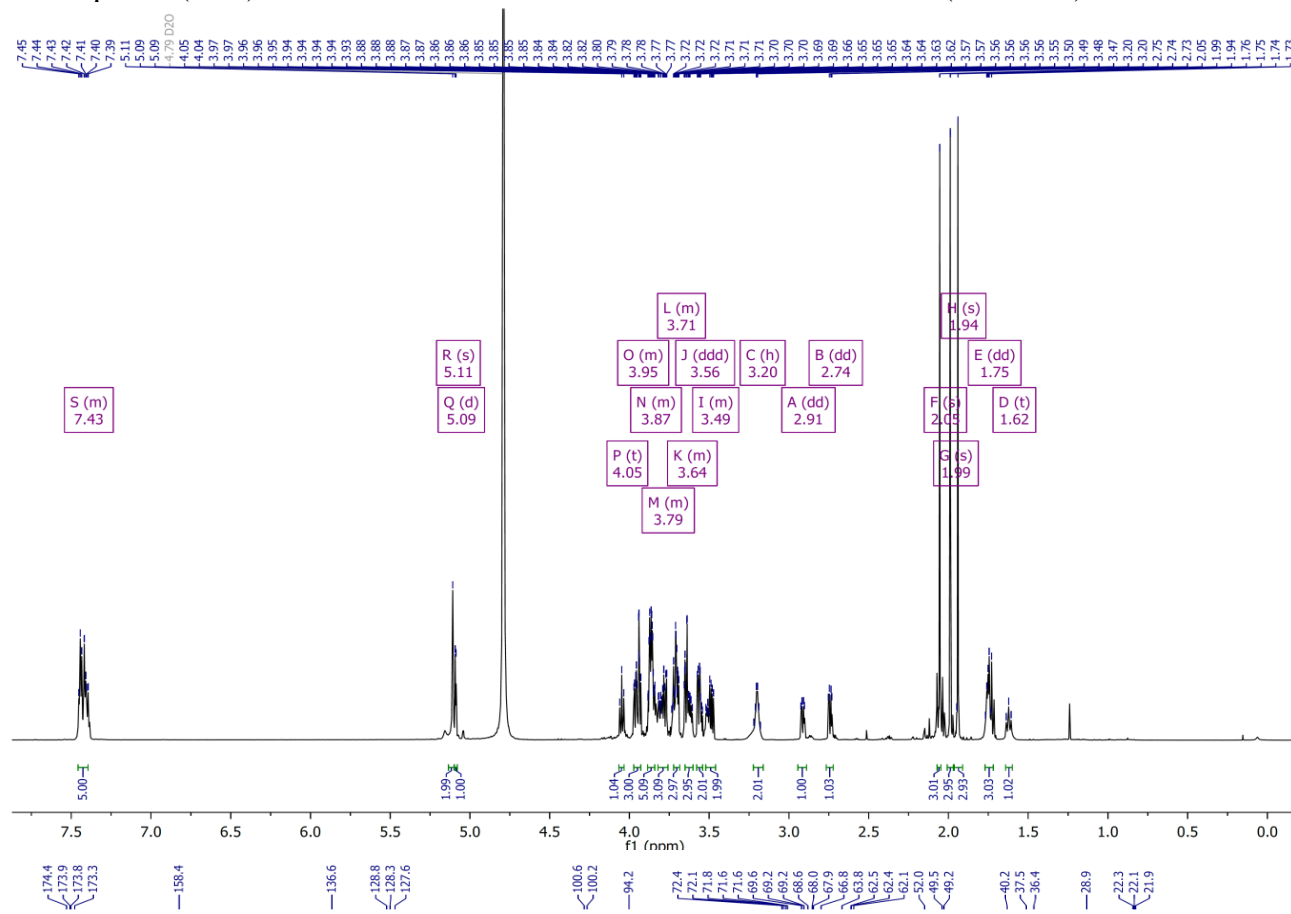

$^{13}\text{C}$  NMR spectrum of Neu5Ac7NAc $\alpha$ 2-6Gal $\alpha$ 1-4Neu5Ac $\alpha$ ProNHcbz (**7NAc-S3**) in  $\text{D}_2\text{O}$ . The x-axis is chemical shift in ppm (f1) from 0 to 180. The spectrum shows several peaks with labels: 174.4, 173.9, 173.8, 173.3, 158.4, 136.6, 128.8, 128.2, 127.8, 100.6, 100.2, 94.2, 72.4, 72.1, 71.8, 71.6, 71.6, 69.6, 69.2, 69.2, 68.6, 68.0, 66.8, 62.5, 62.4, 62.1, 49.5, 49.2, 40.2, 37.5, 36.4, 28.9, 22.3, 22.1, 21.9.

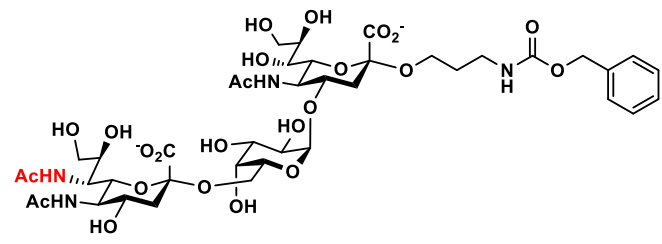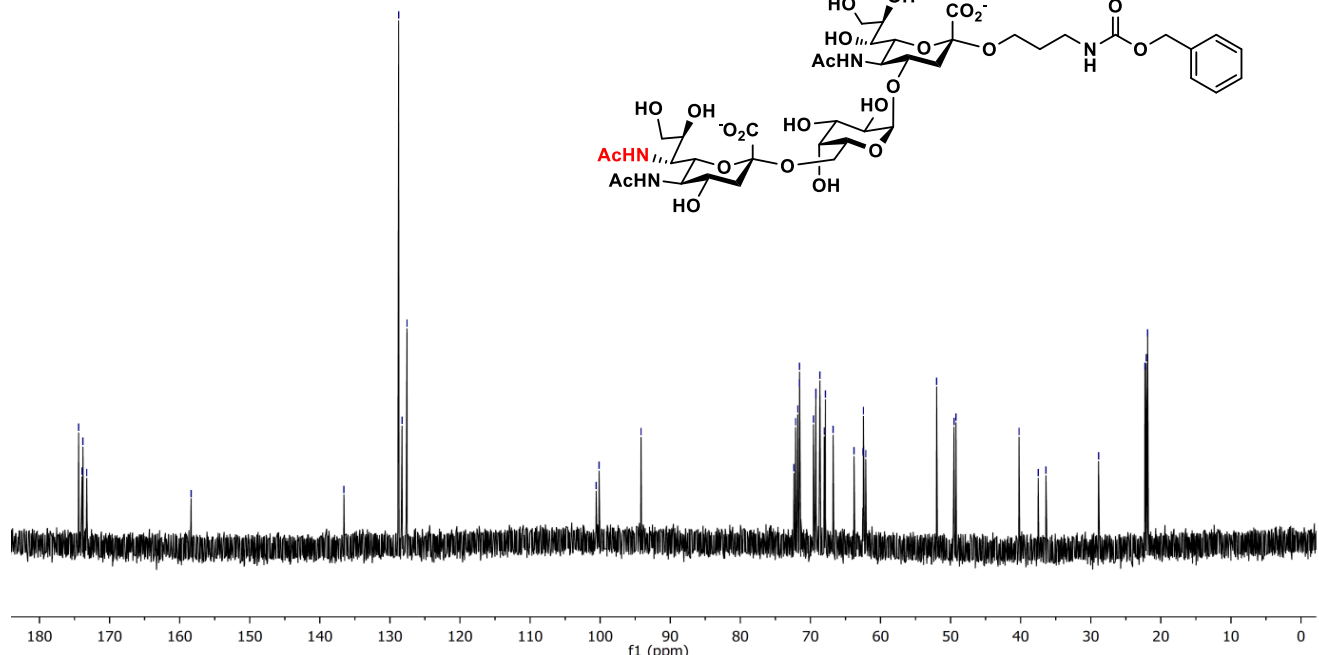

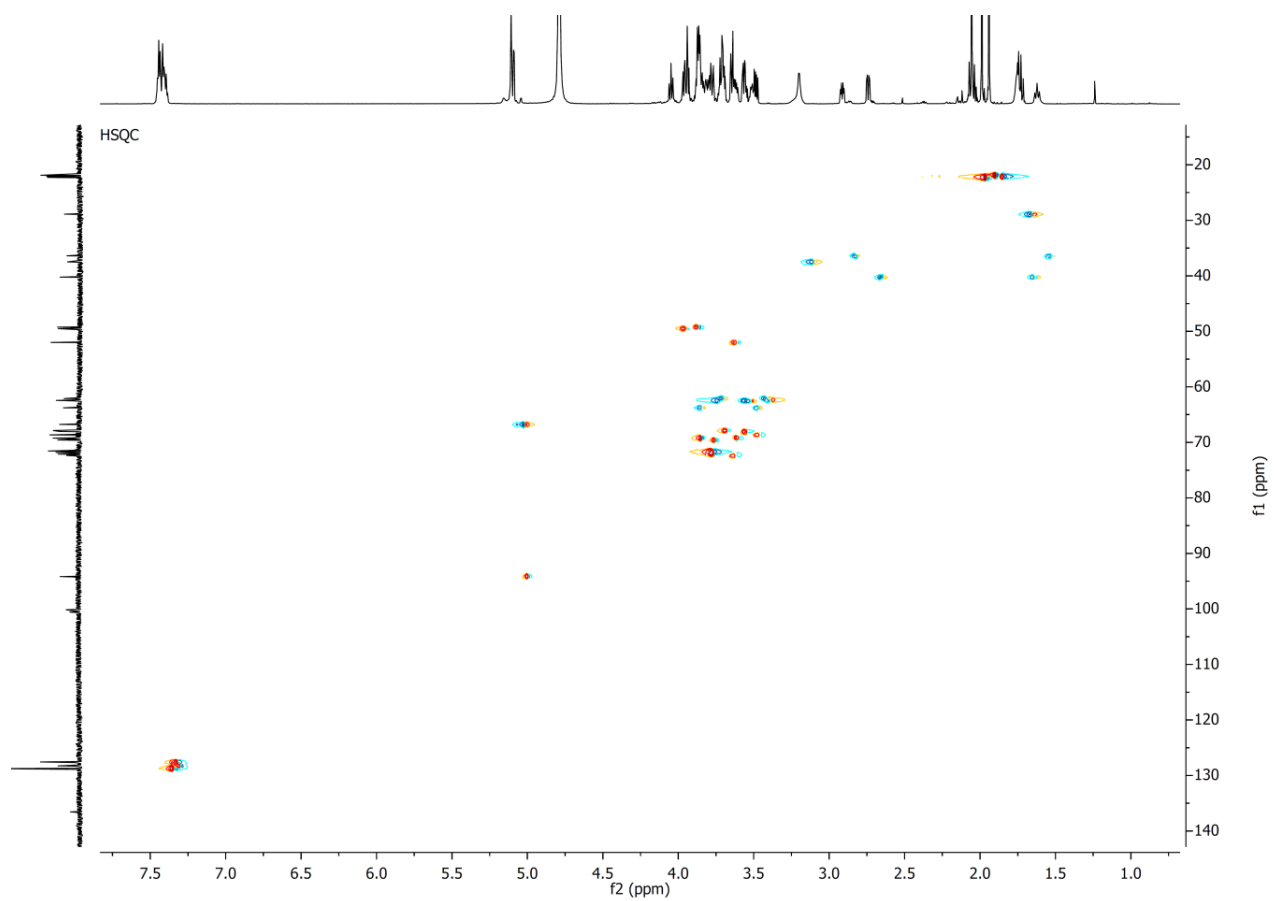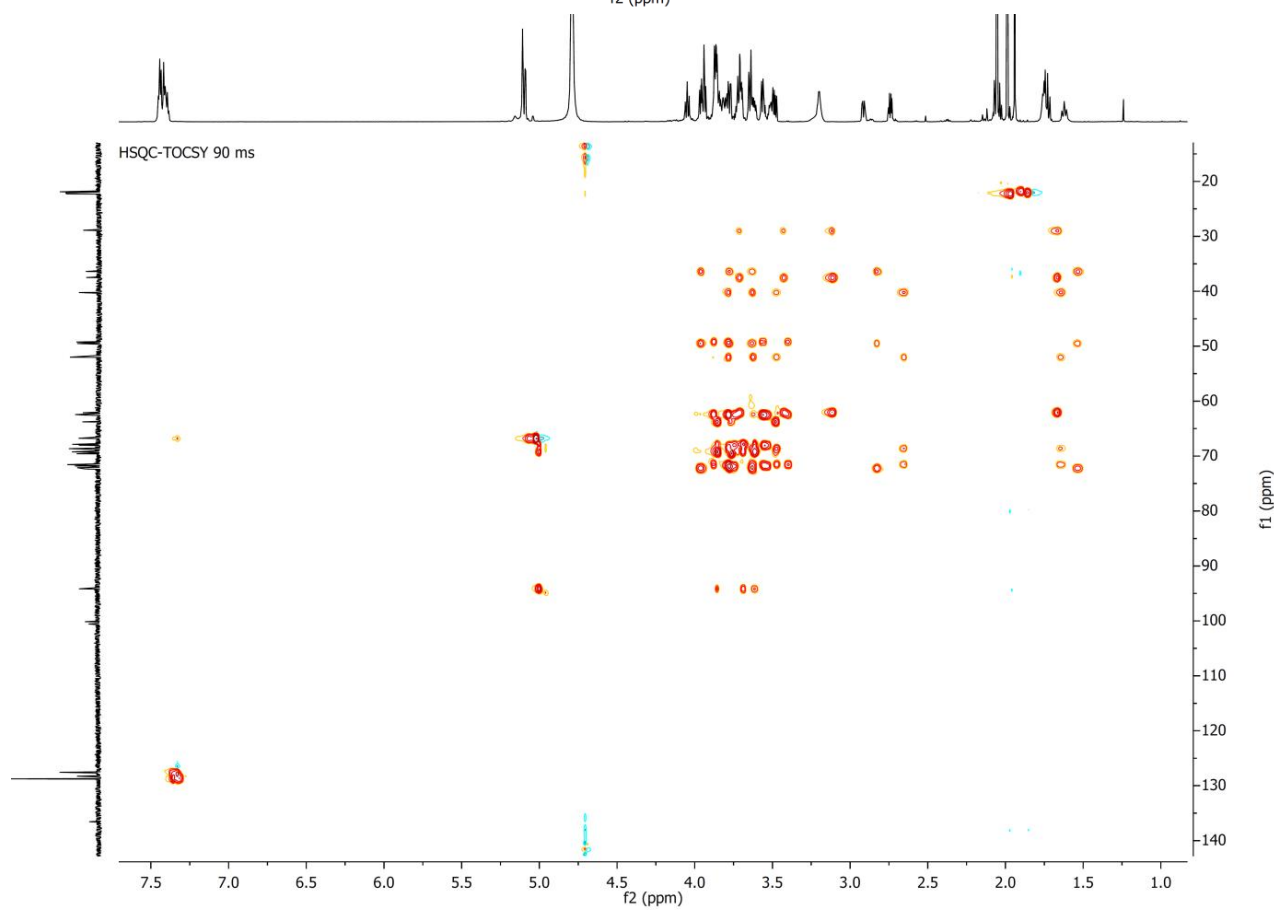



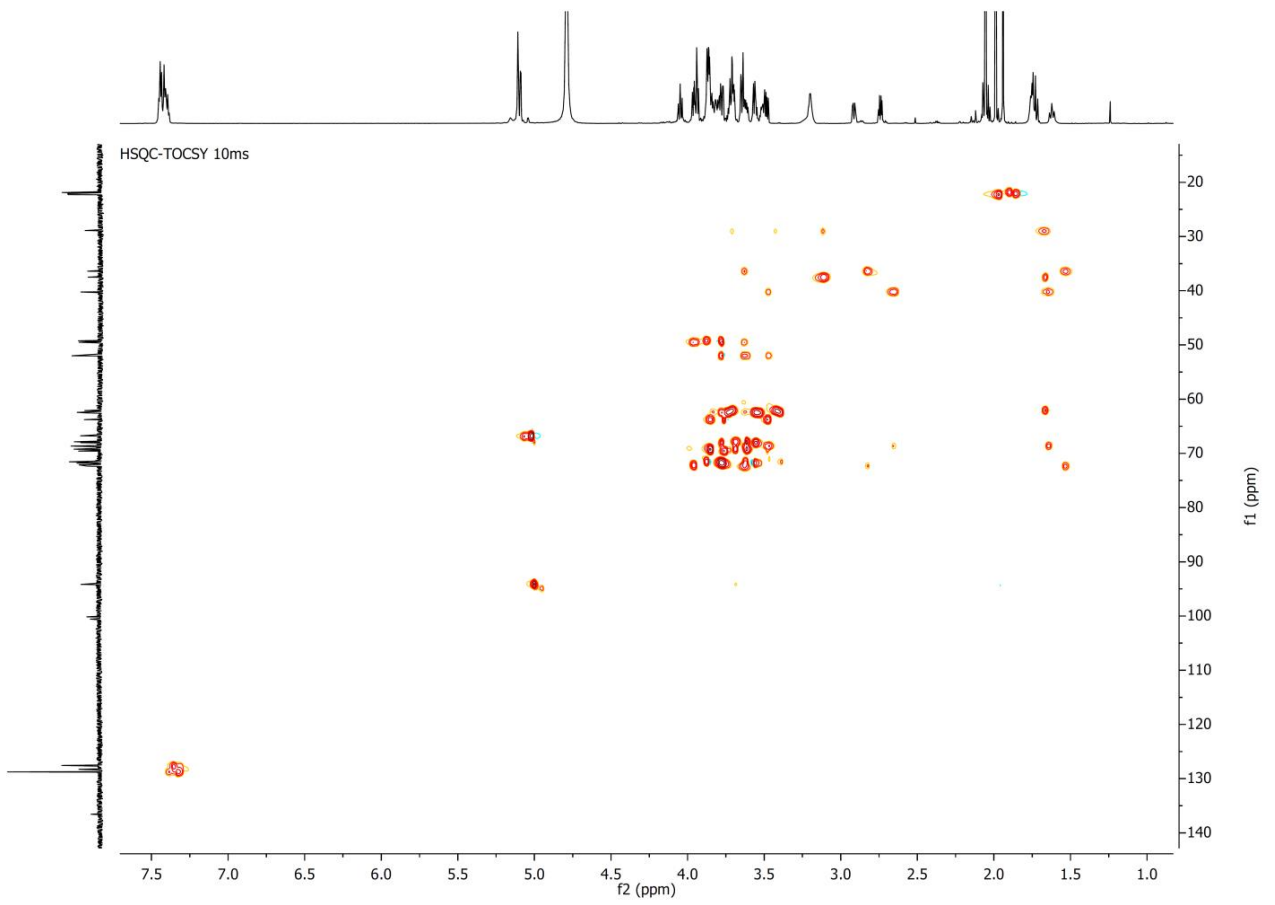

$^1\text{H}$  (800 MHz),  $^{13}\text{C}$  (200 MHz), HSQC (800 MHz), and HSQC-TOCSY (90 ms and 10 ms, 800 MHz) NMR spectra ( $\text{D}_2\text{O}$ ) of Neu5Ac $\alpha$ Neu3 $\alpha$ 2-6Gal $\alpha$ 1-4Neu5Ac $\alpha$ ProNHCBz (**9N<sub>3</sub>-S3**)

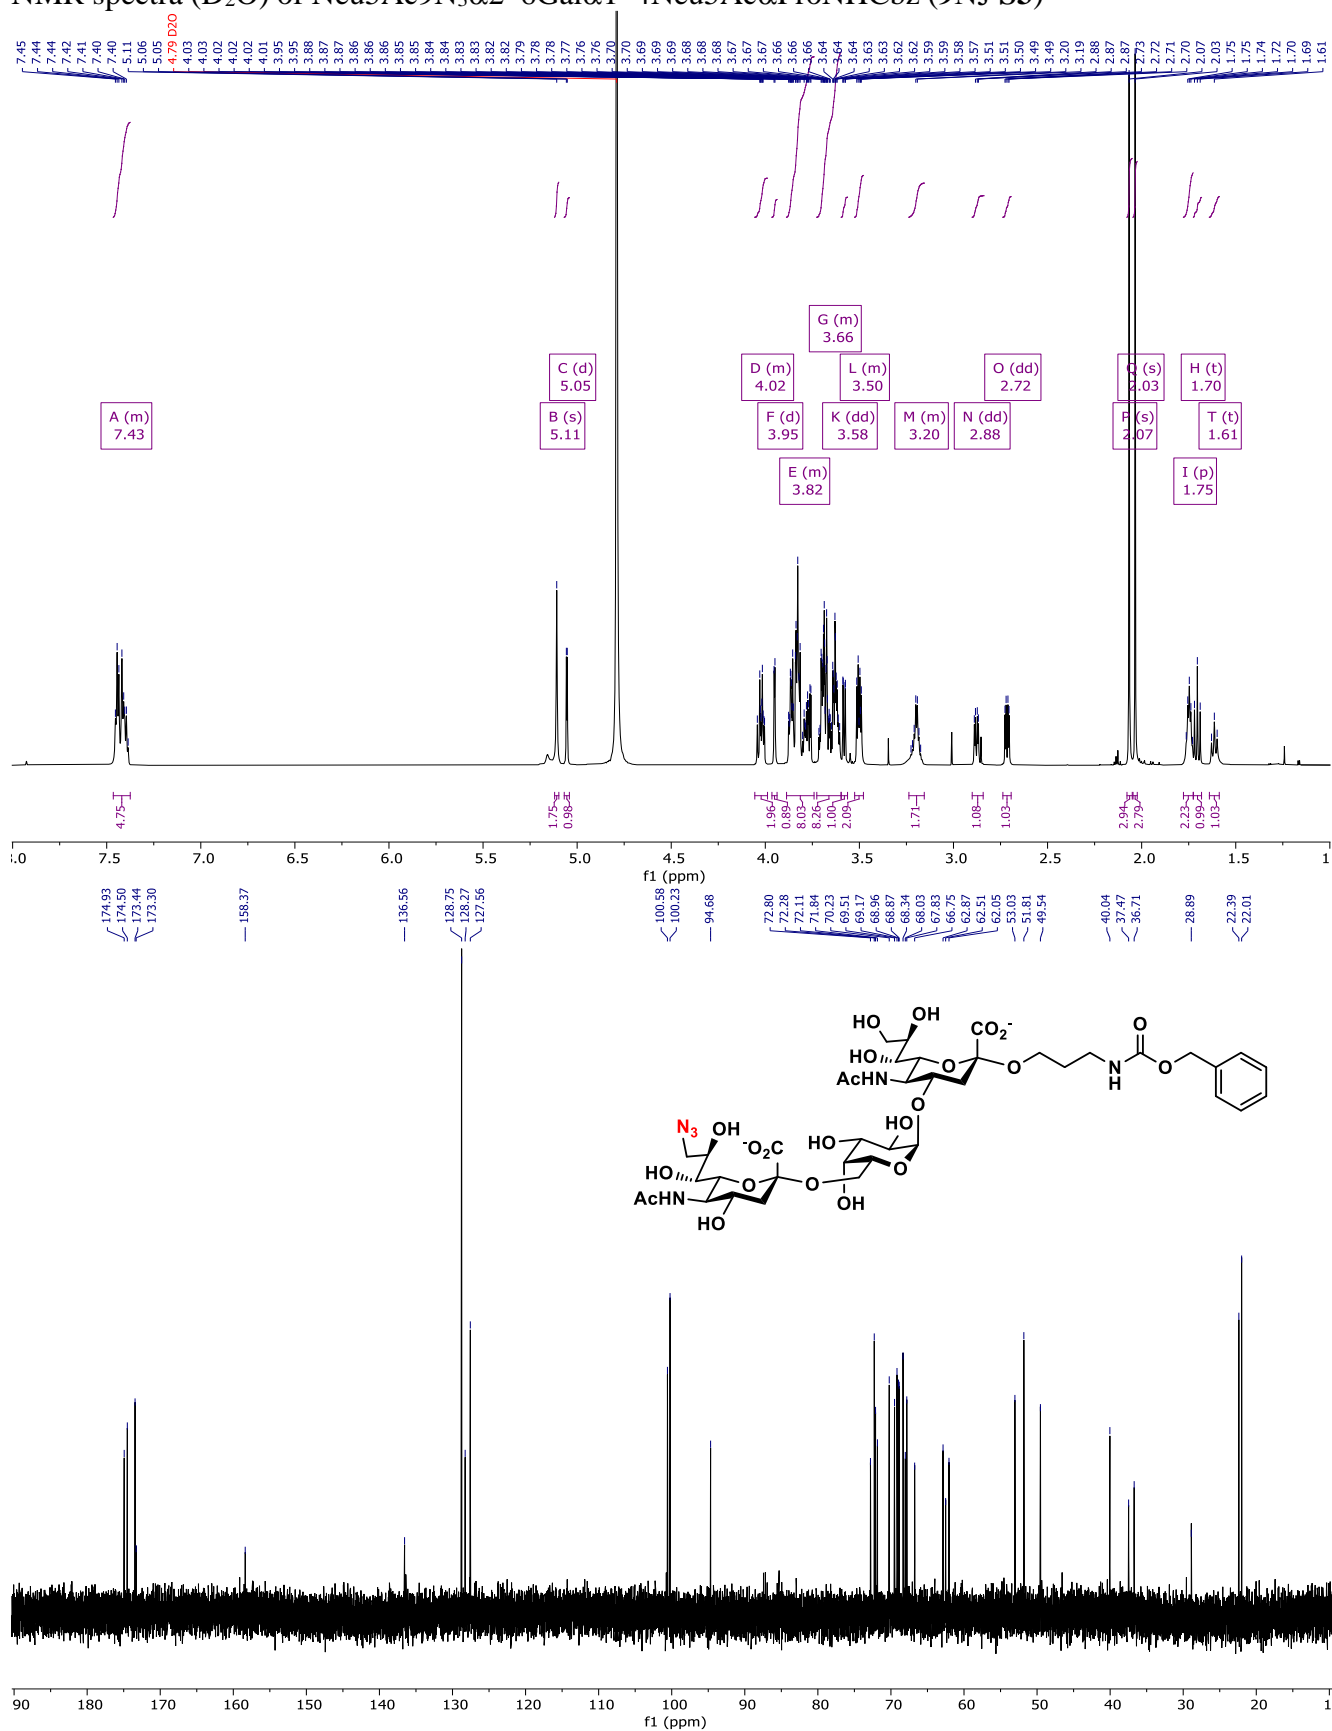

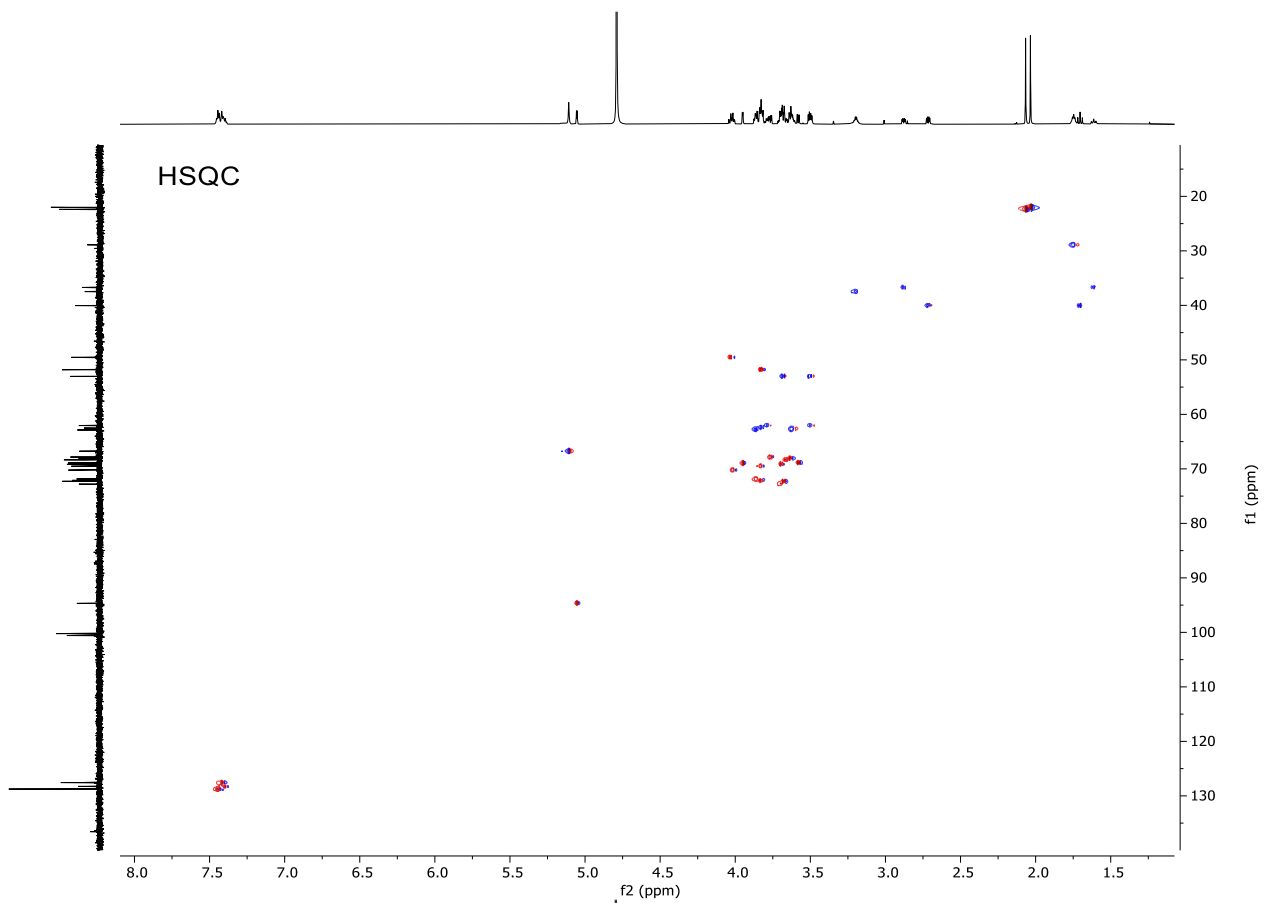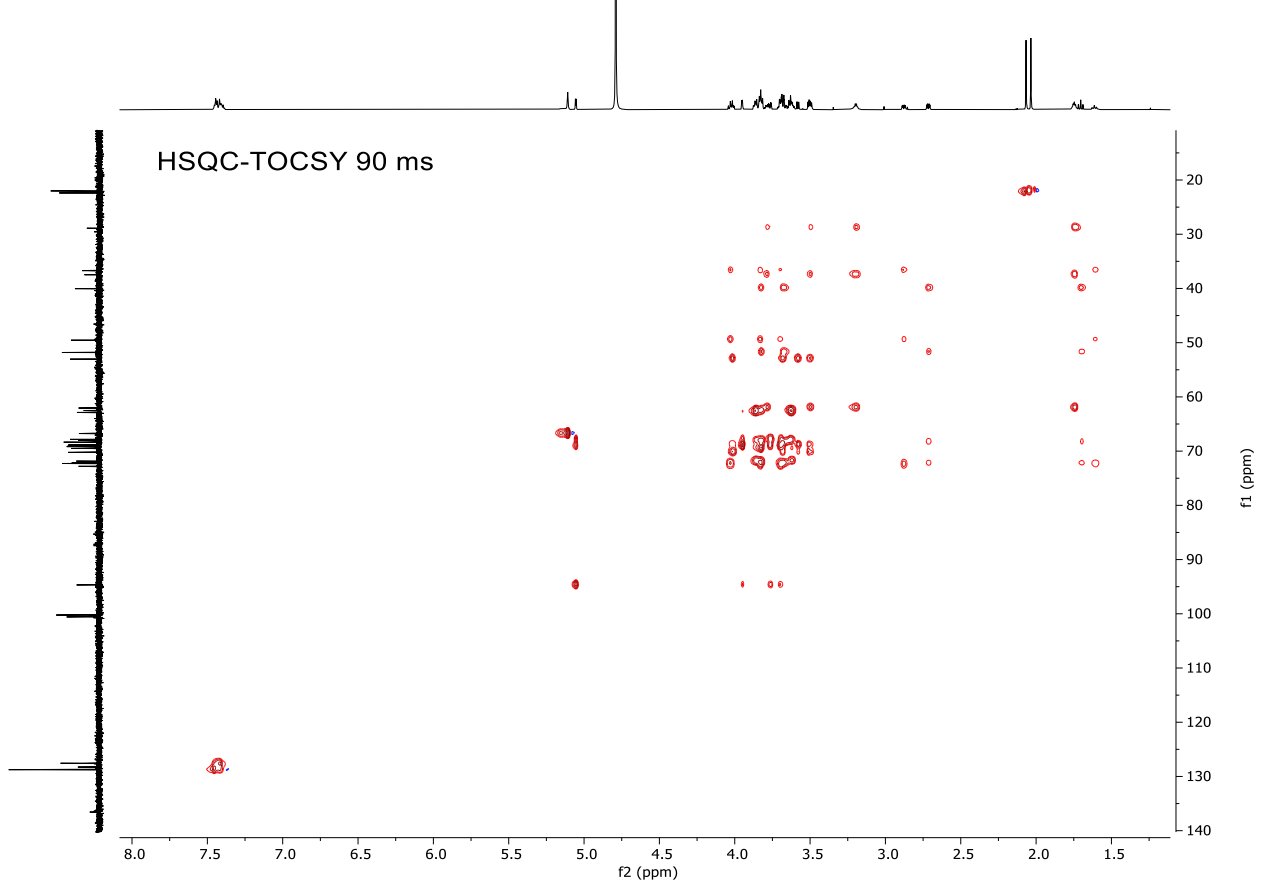

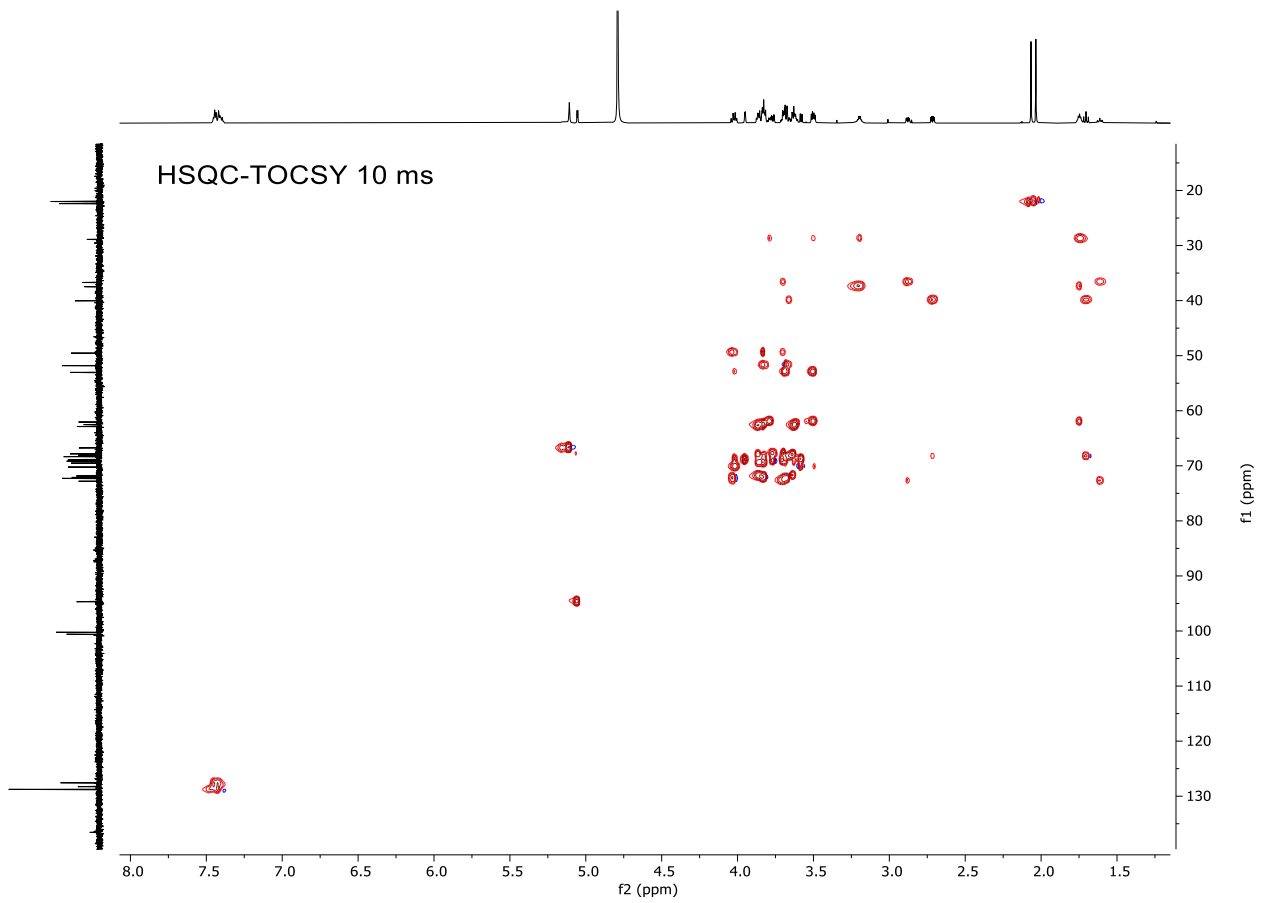

$^1\text{H}$  (800 MHz),  $^{13}\text{C}$  (200 MHz), HSQC (800 MHz), and HSQC-TOCSY (90 ms and 10 ms, 800 MHz) NMR spectra ( $\text{D}_2\text{O}$ ) of Neu5Ac9NAc $\alpha$ 2-6Gal $\alpha$ 1-4Neu5Ac $\alpha$ ProNHcbz (**9NAc-S3**)

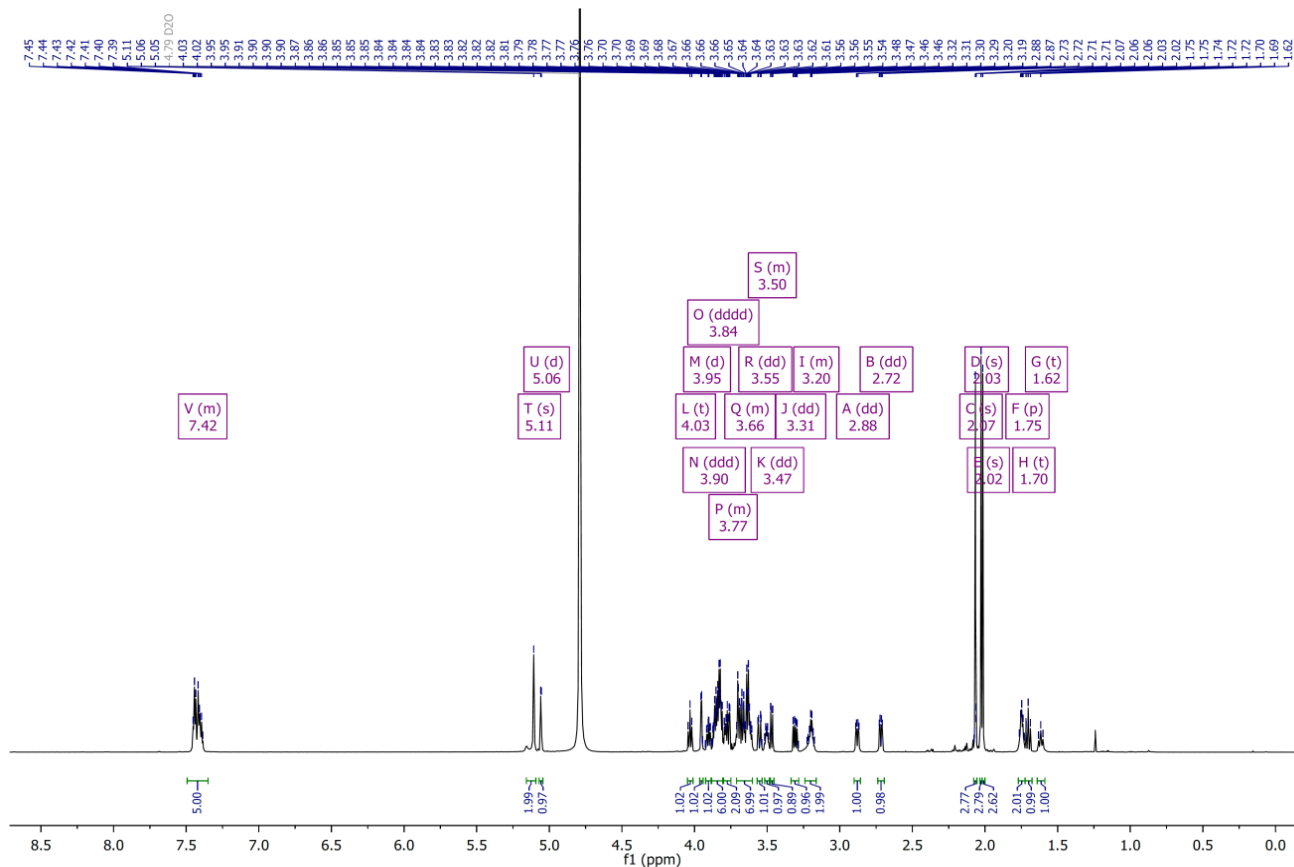

174.9  
174.3  
174.4  
173.5

158.4

136.1  
128.8  
128.3  
127.6

100.3

94.7

72.8  
72.1  
72.1  
71.8  
70.0  
69.8  
69.5  
69.2  
68.9  
68.3  
68.3  
67.8  
66.4  
62.8  
62.5  
62.1  
51.8  
49.1

43.1  
40.0  
37.5  
36.7

28.9

22.4  
22.0  
21.8

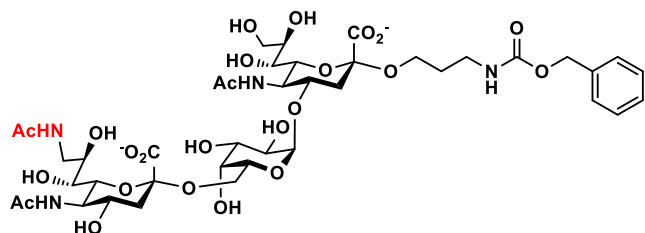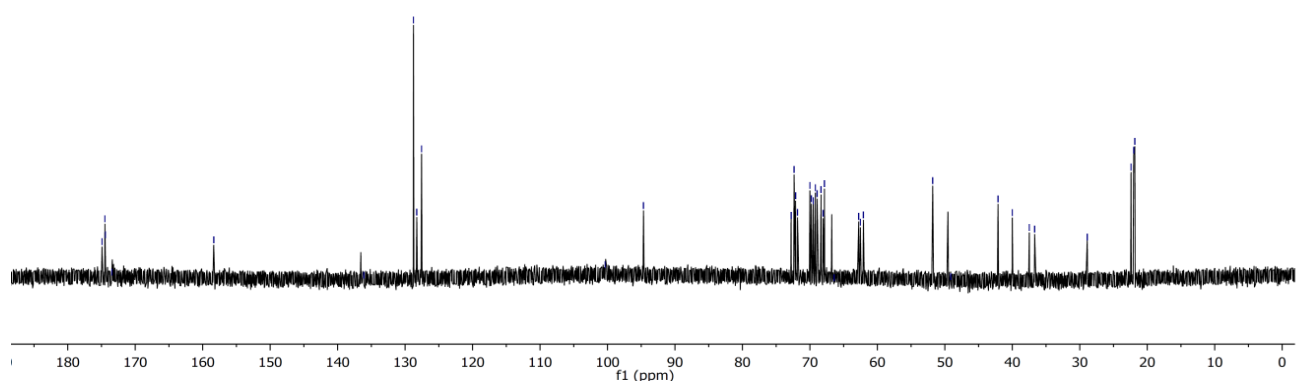

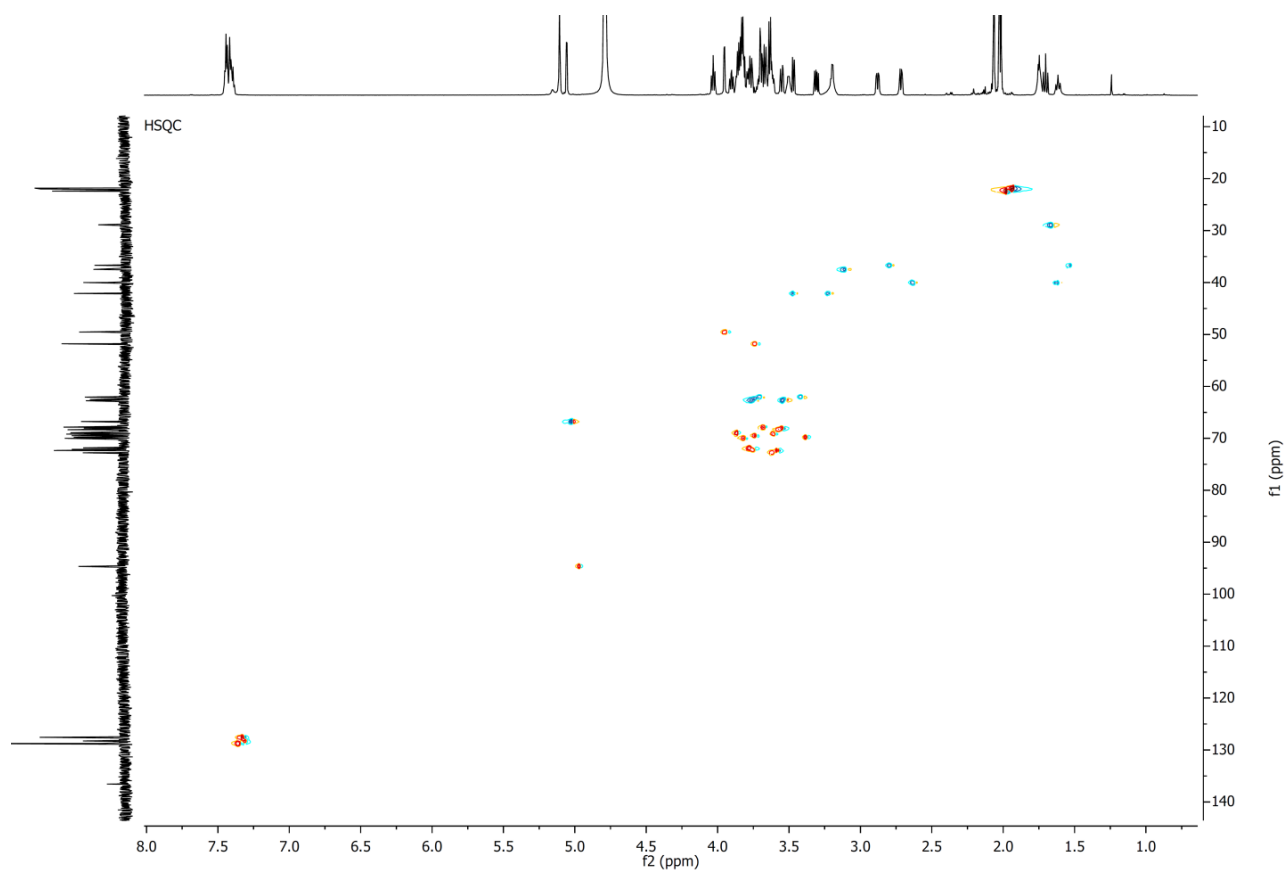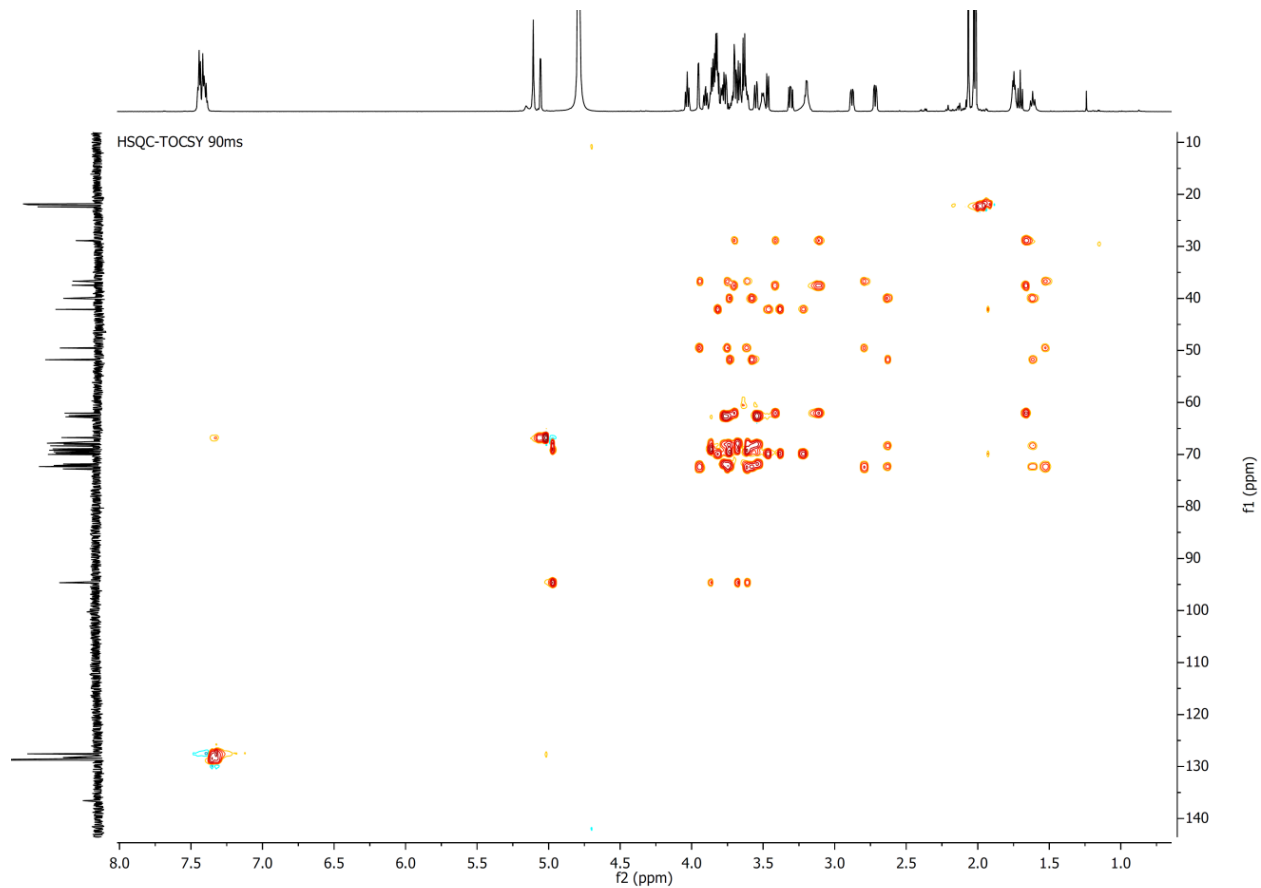

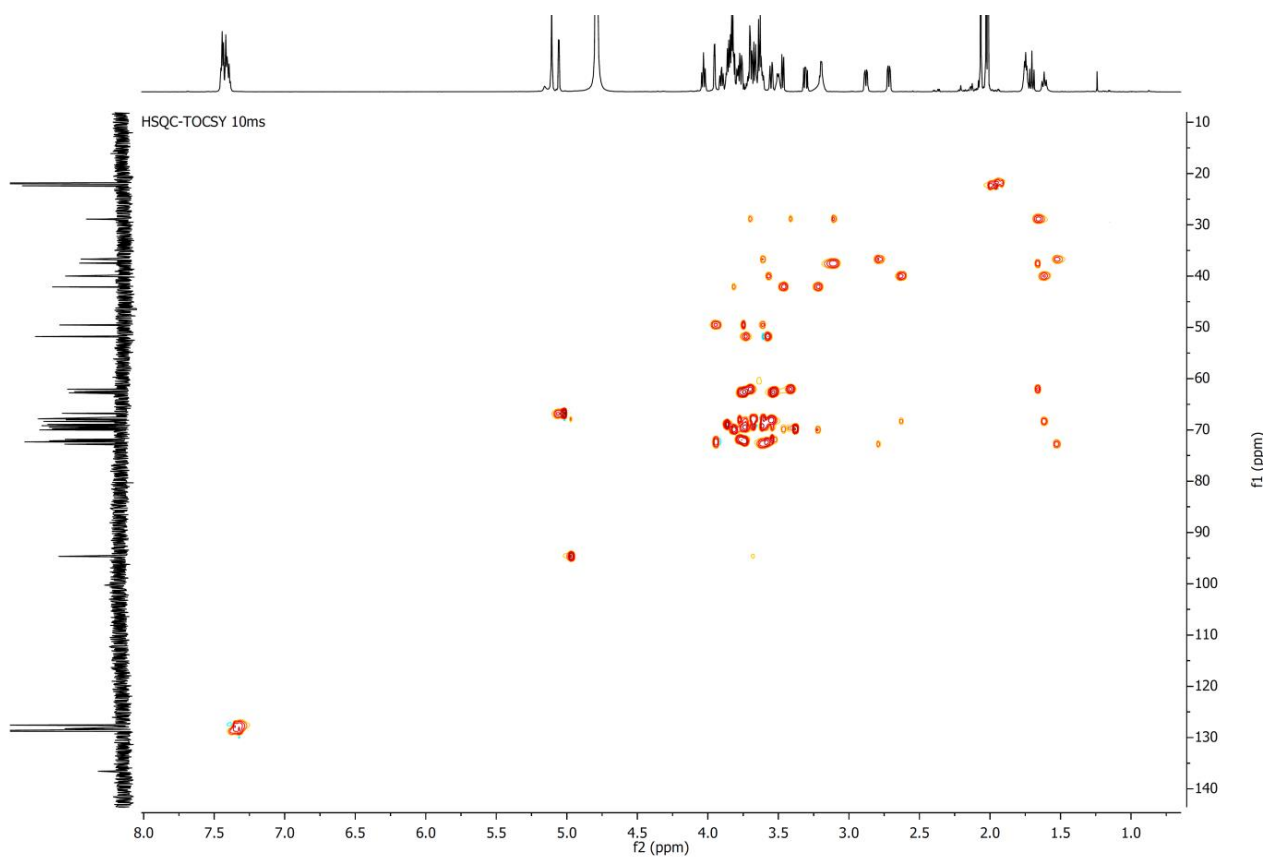

$^1\text{H}$  (800 MHz),  $^{13}\text{C}$  (200 MHz), HSQC (800 MHz), and HSQC-TOCSY (90 ms and 10 ms, 800 MHz) NMR spectra ( $\text{D}_2\text{O}$ ) of Gal $\alpha$ 1-4Neu5Ac $\beta$ 7N $_3$  $\alpha$ 2-6Gal $\alpha$ 1-4Neu5Ac $\alpha$ ProNHCbz (7N $_3$ -G4)

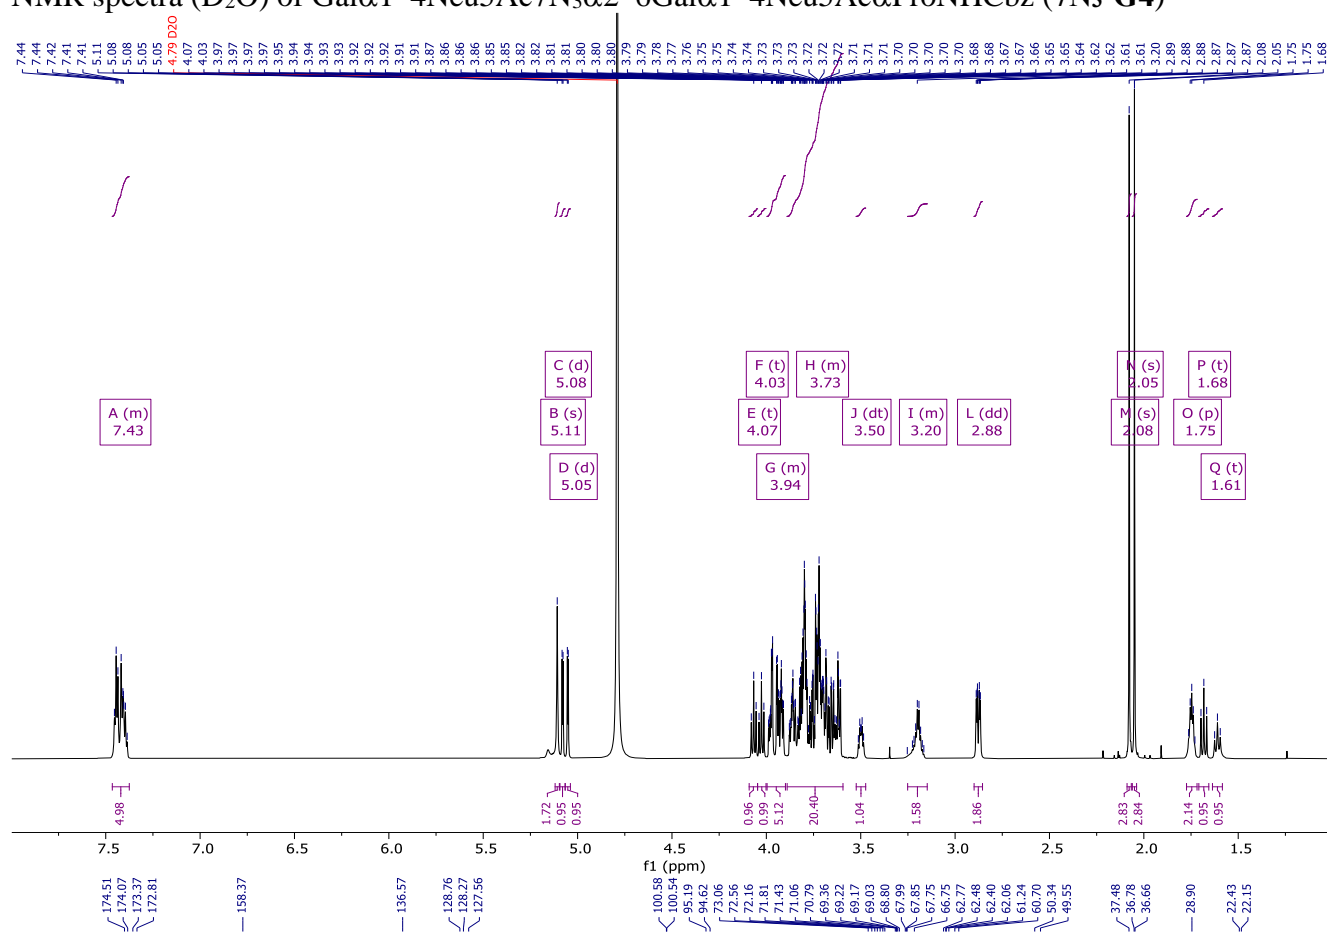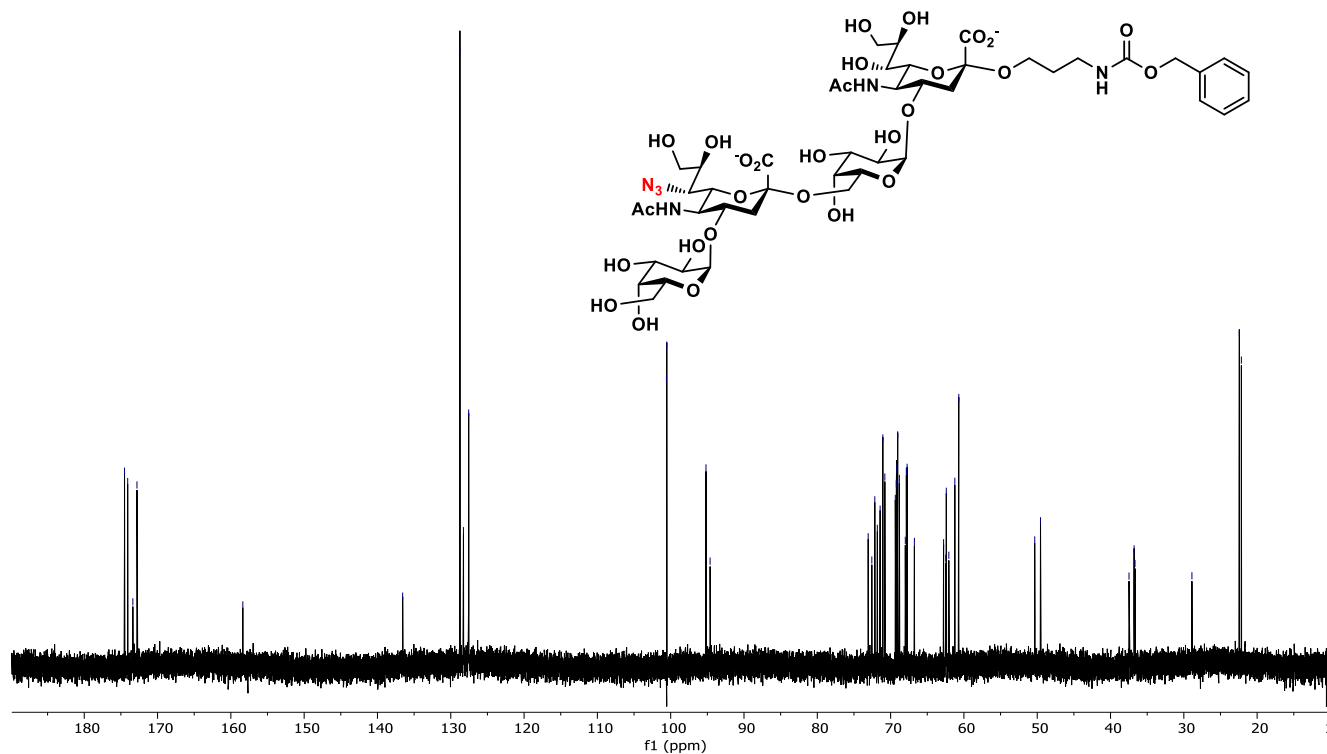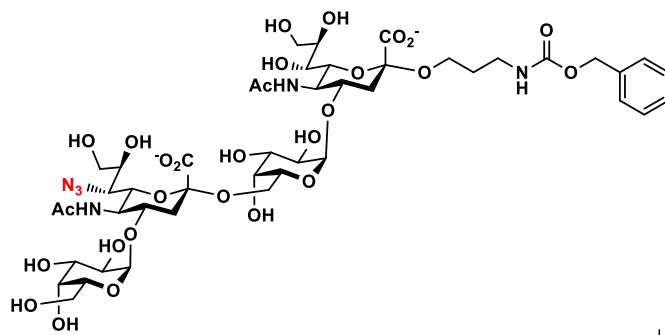



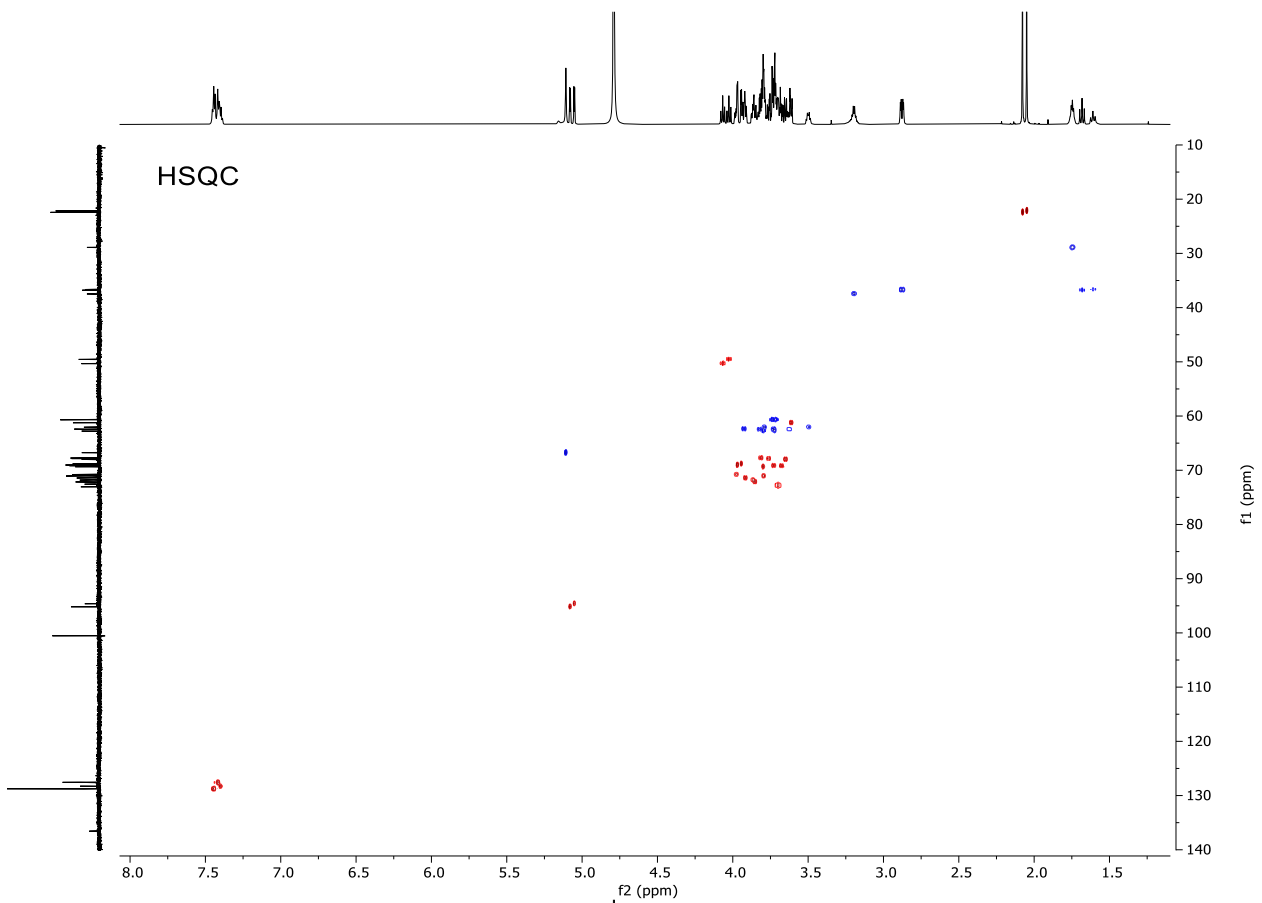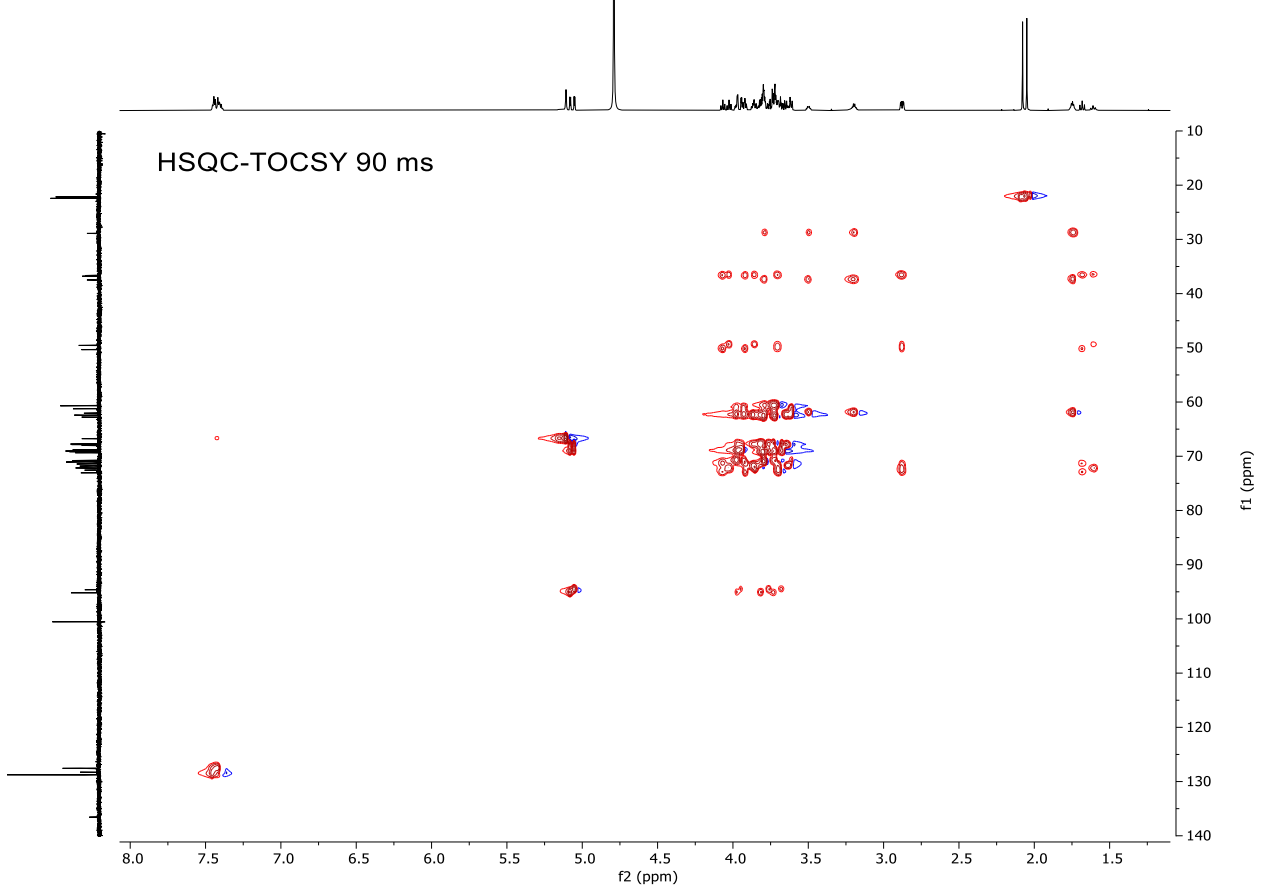

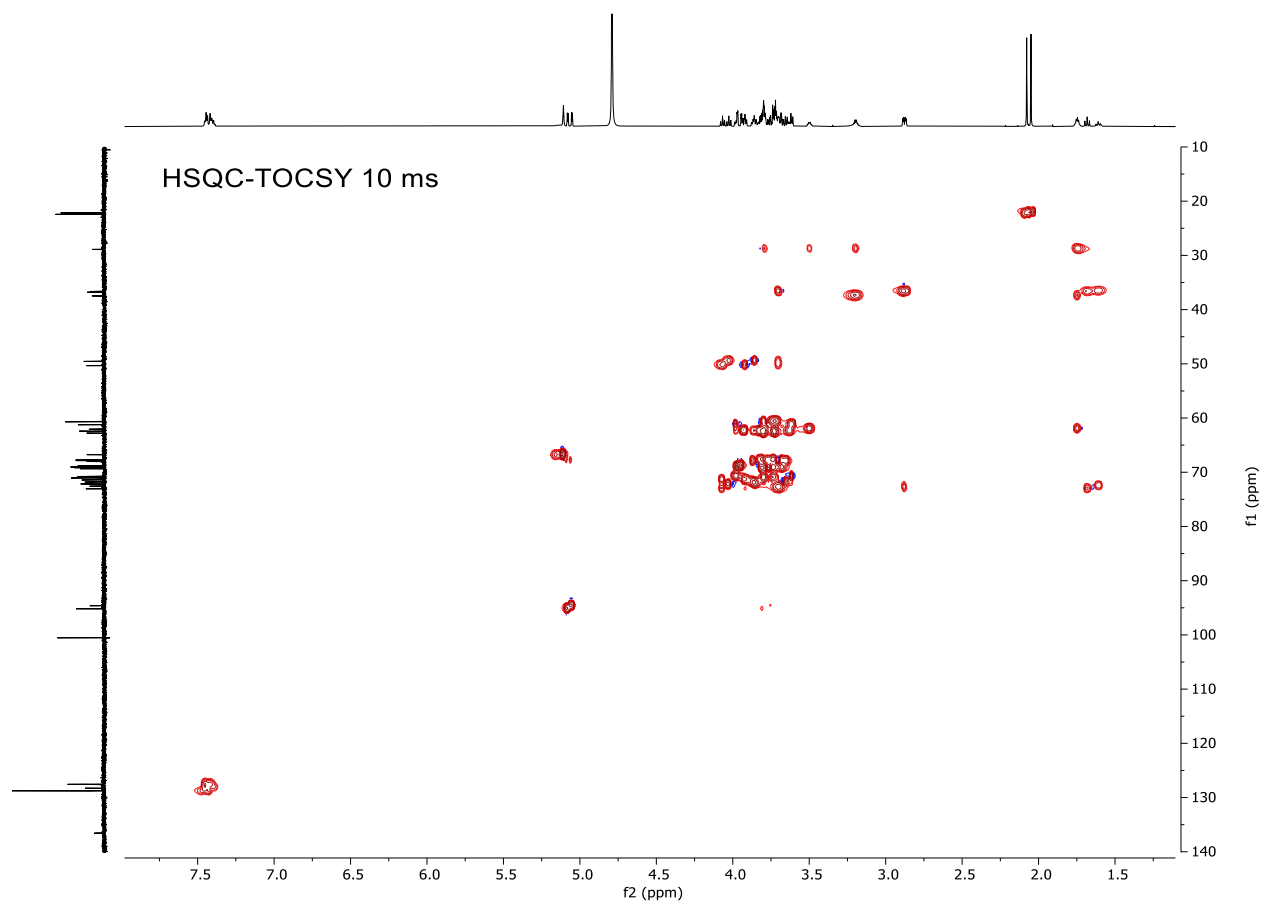

$^1\text{H}$  (800 MHz),  $^{13}\text{C}$  (200 MHz), HSQC (800 MHz), and HSQC-TOCSY (90 ms and 10 ms, 800 MHz) NMR spectra ( $\text{D}_2\text{O}$ ) of Gal $\alpha$ 1-4Neu5Ac7NAc $\alpha$ 2-6Gal $\alpha$ 1-4Neu5Ac $\alpha$ ProNHcbz (**7NAc-G4**)

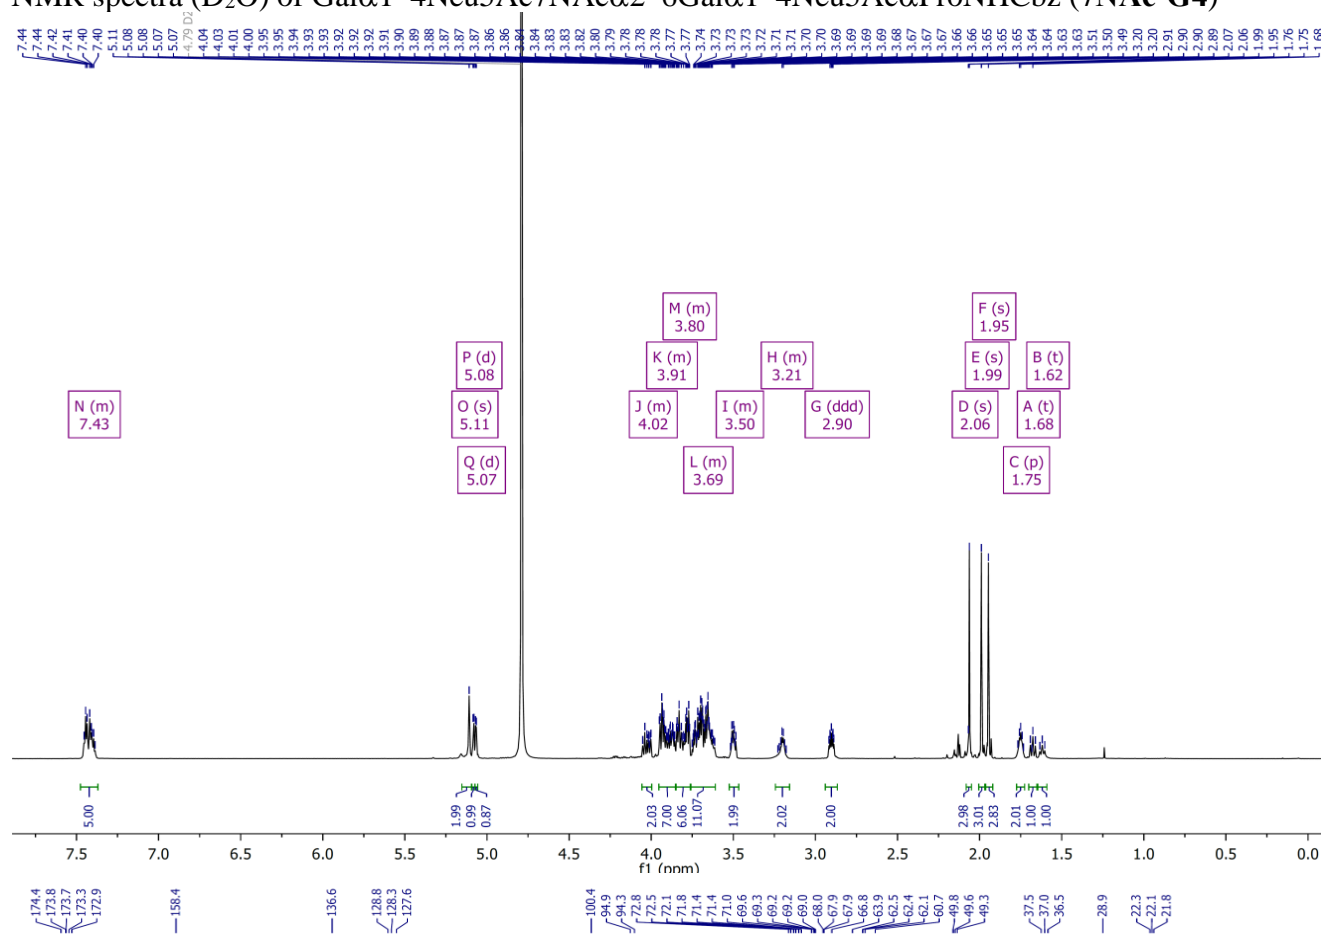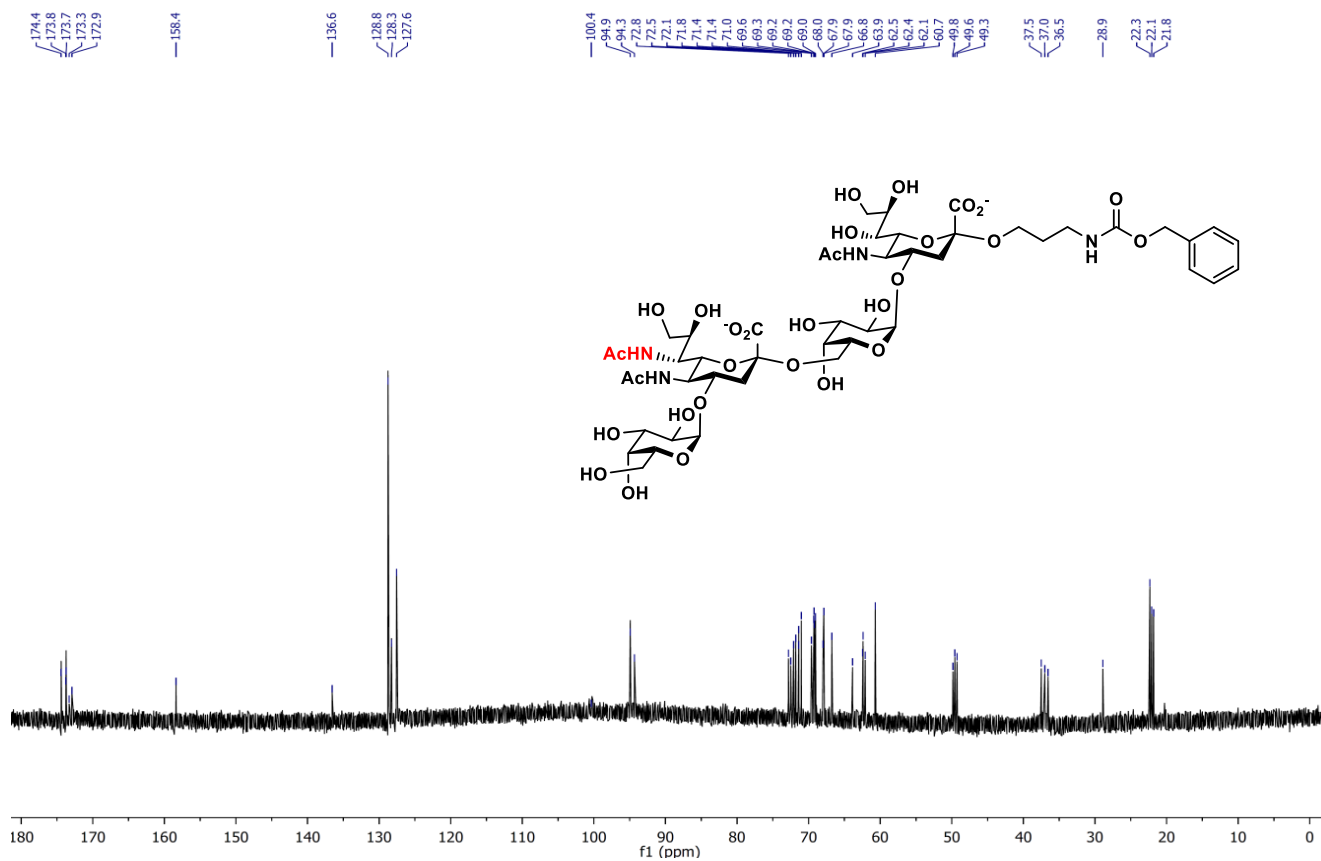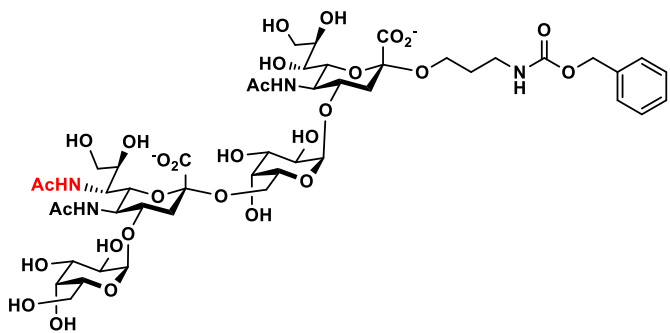

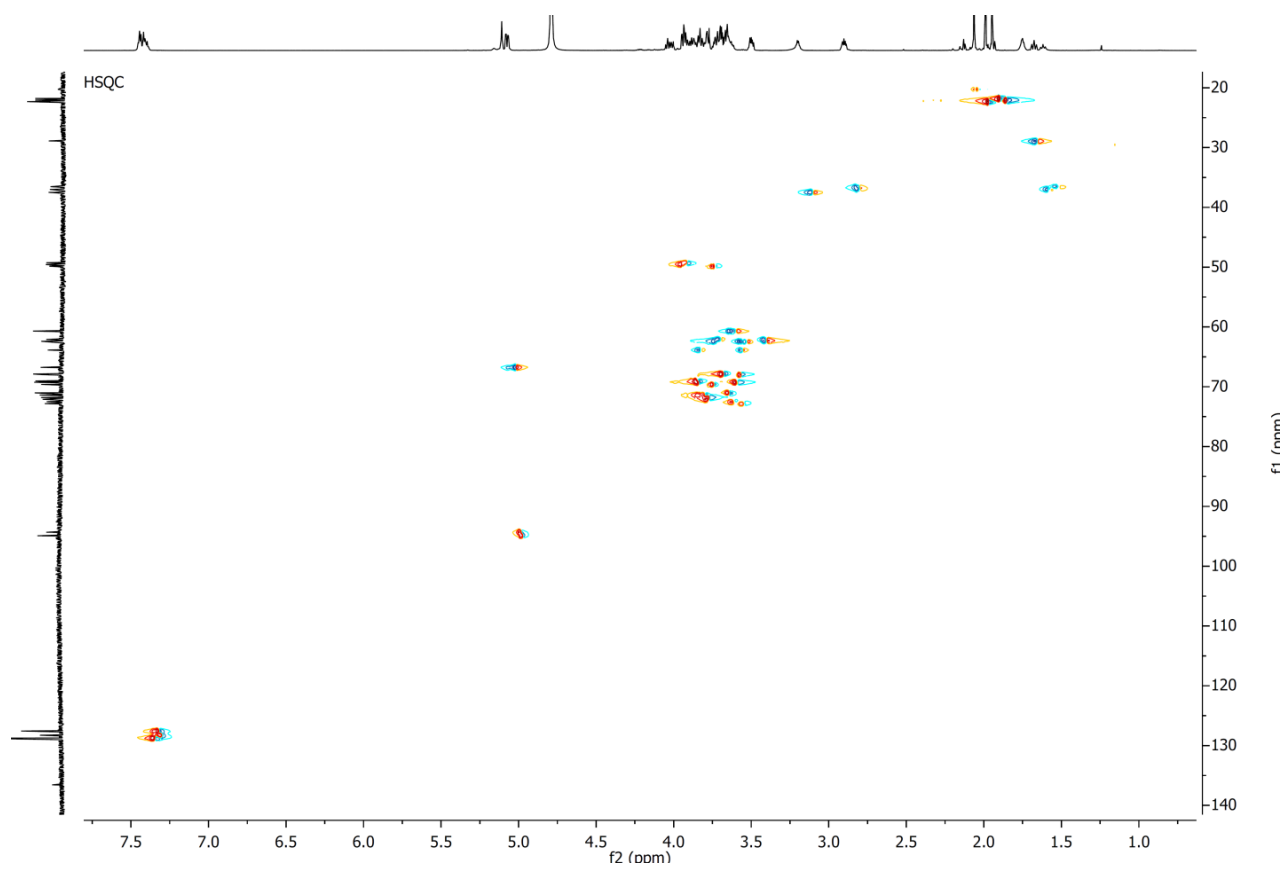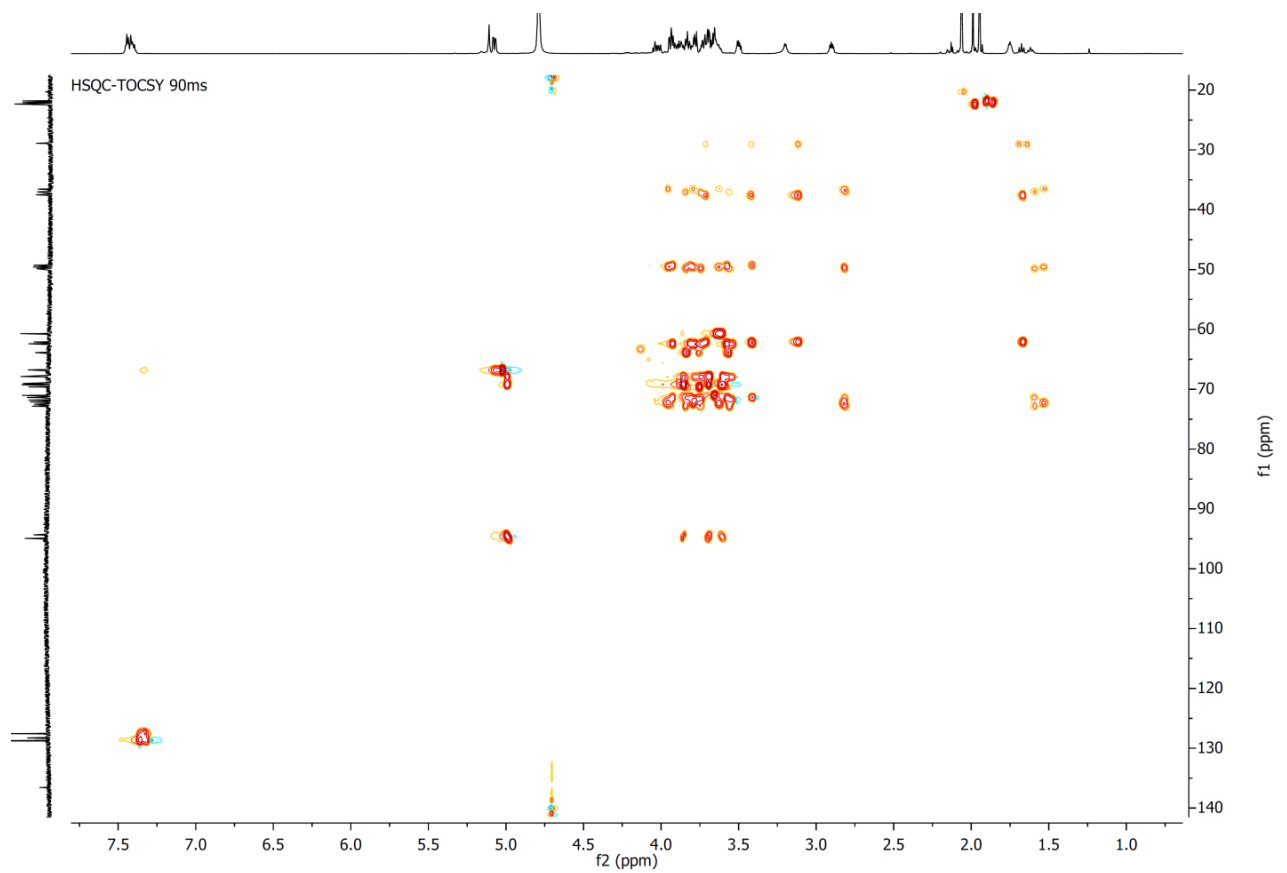

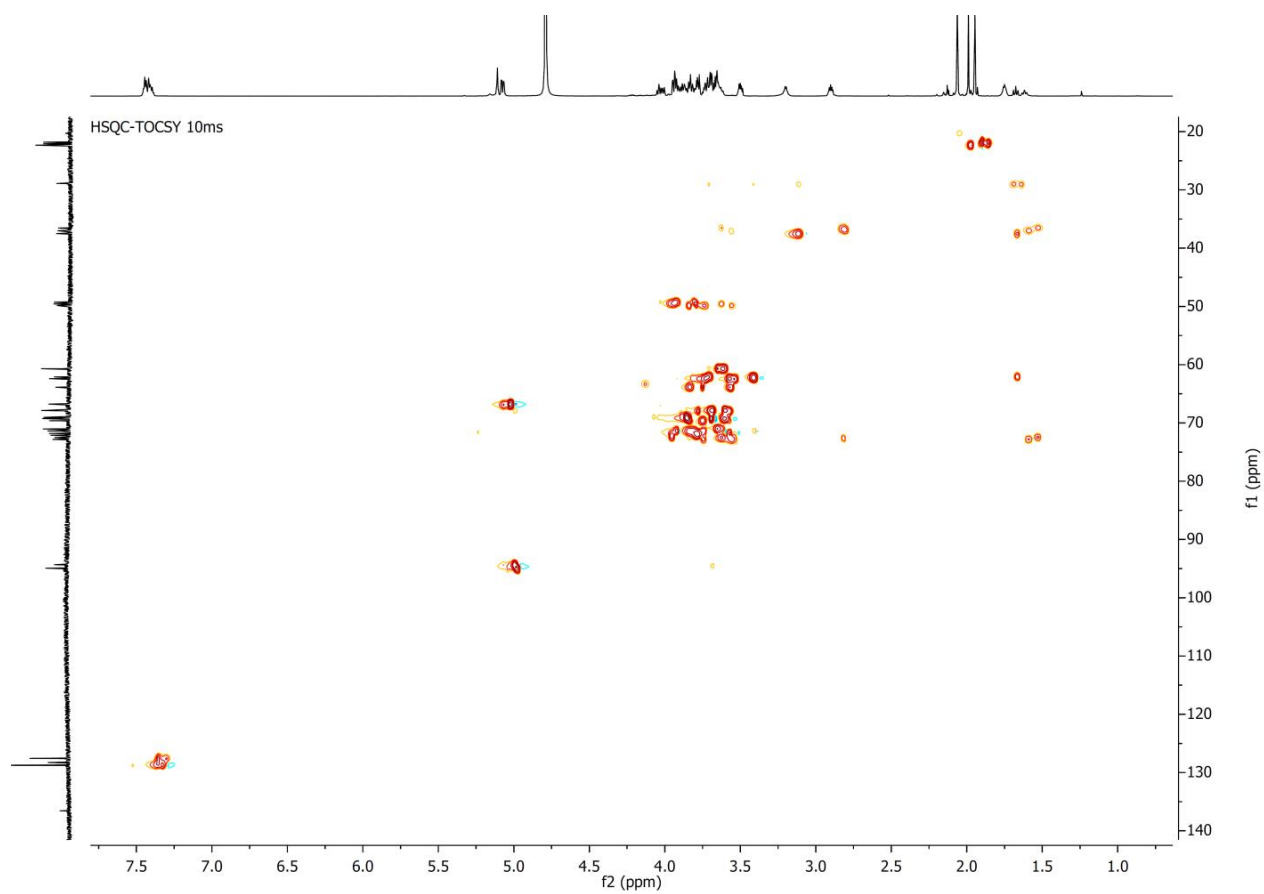

$^1\text{H}$  (800 MHz),  $^{13}\text{C}$  (200 MHz), HSQC (800 MHz), and HSQC-TOCSY (90 ms and 10 ms, 800 MHz) NMR spectra ( $\text{D}_2\text{O}$ ) of Gal $\alpha$ 1-4Neu5Ac $\beta$ 9N $_3\alpha$ 2-6Gal $\alpha$ 1-4Neu5Ac $\alpha$ ProNHCbz (**9N $_3$ -G4**)

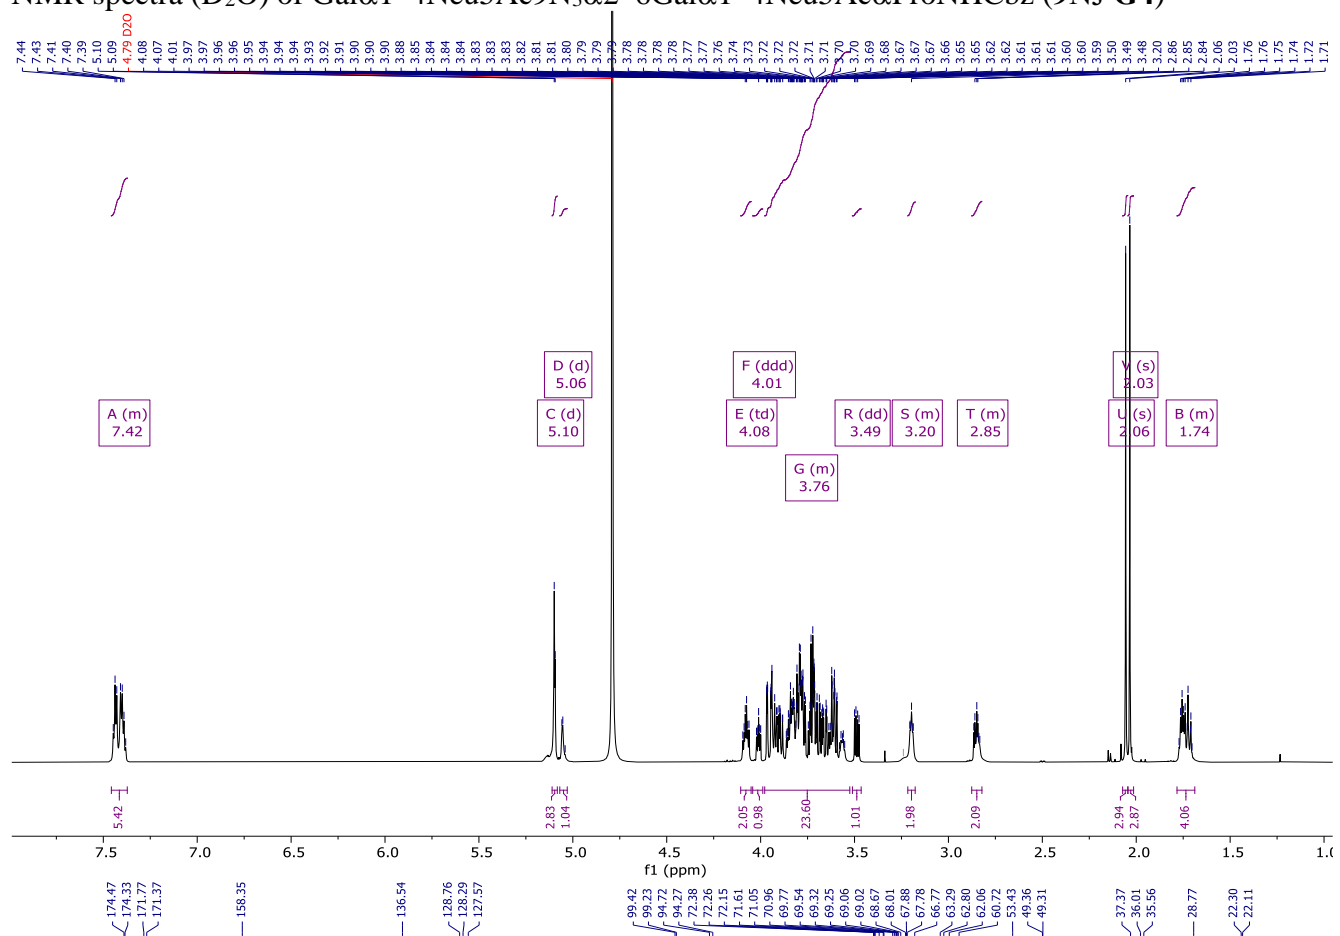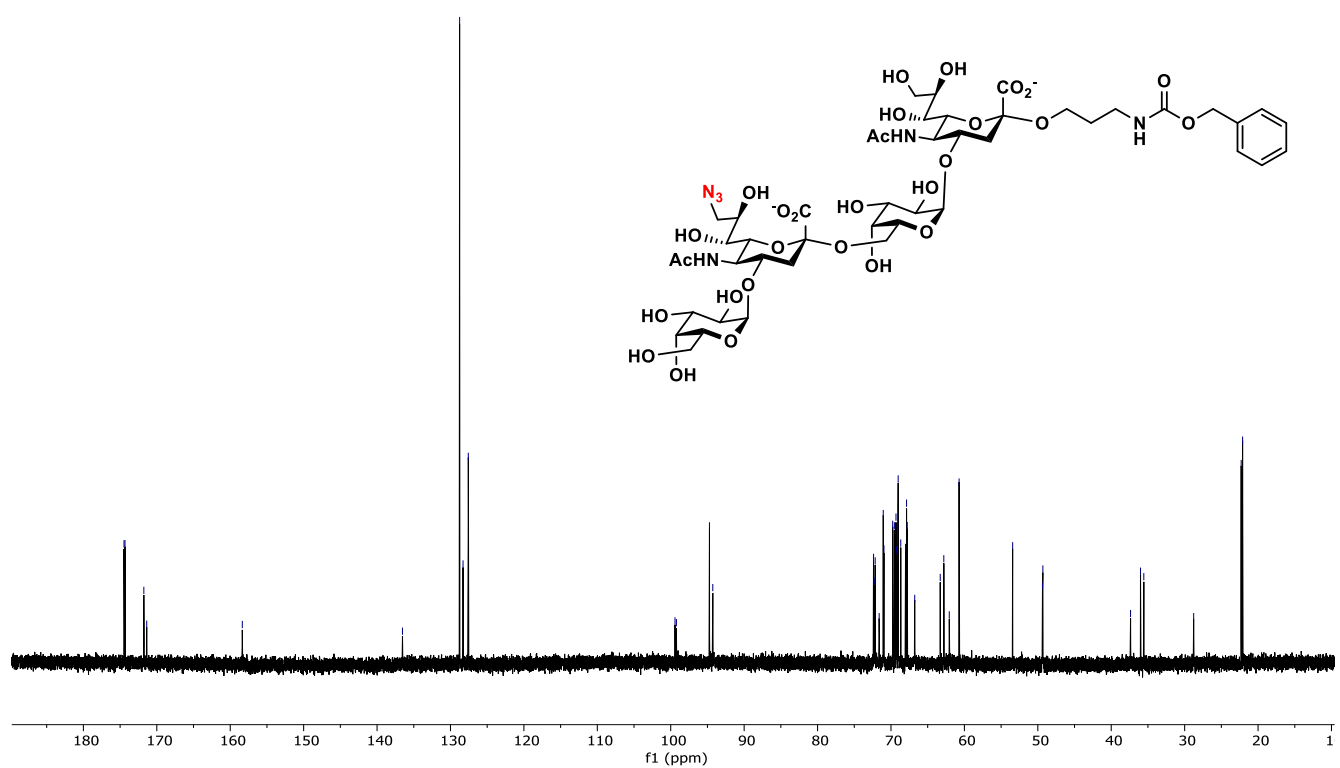

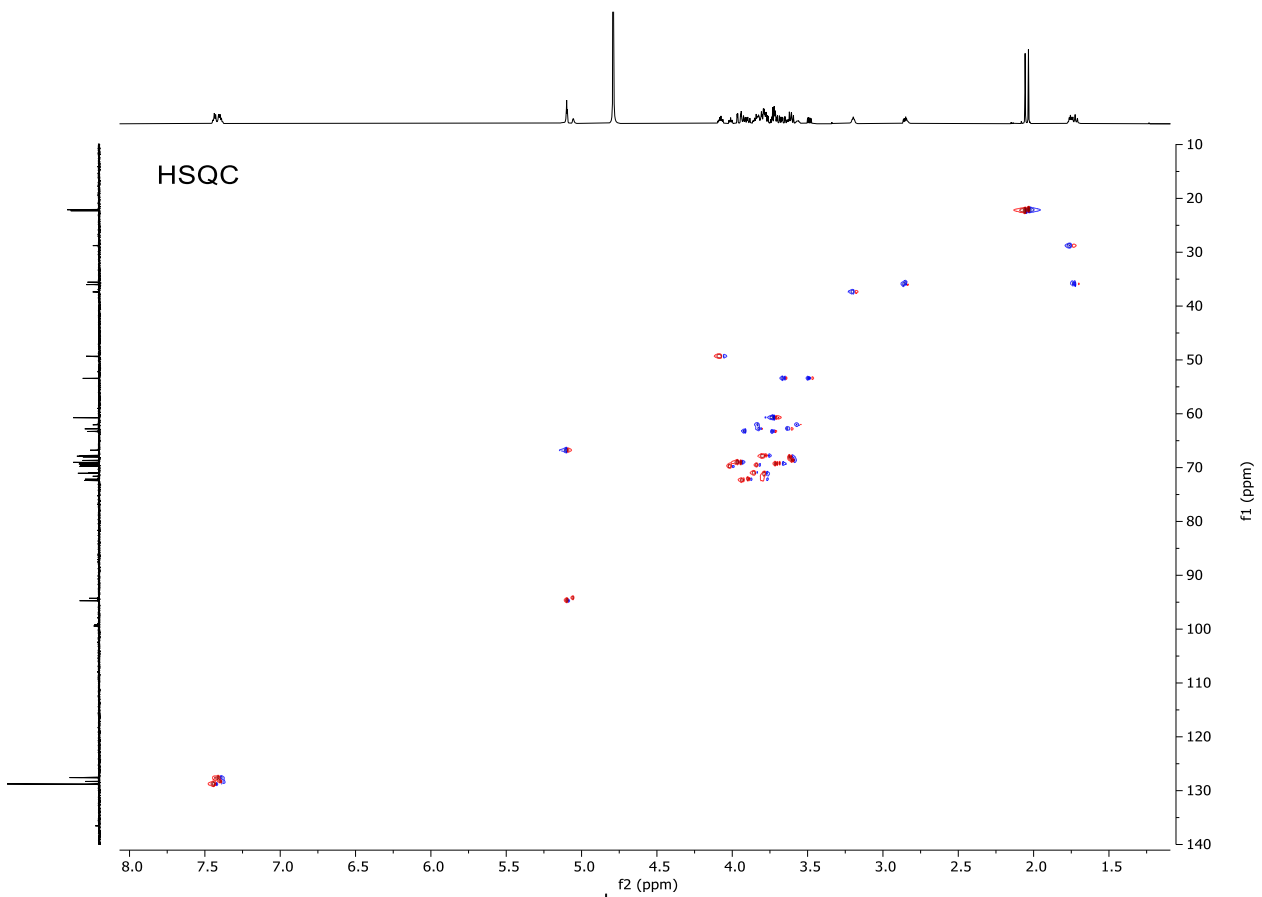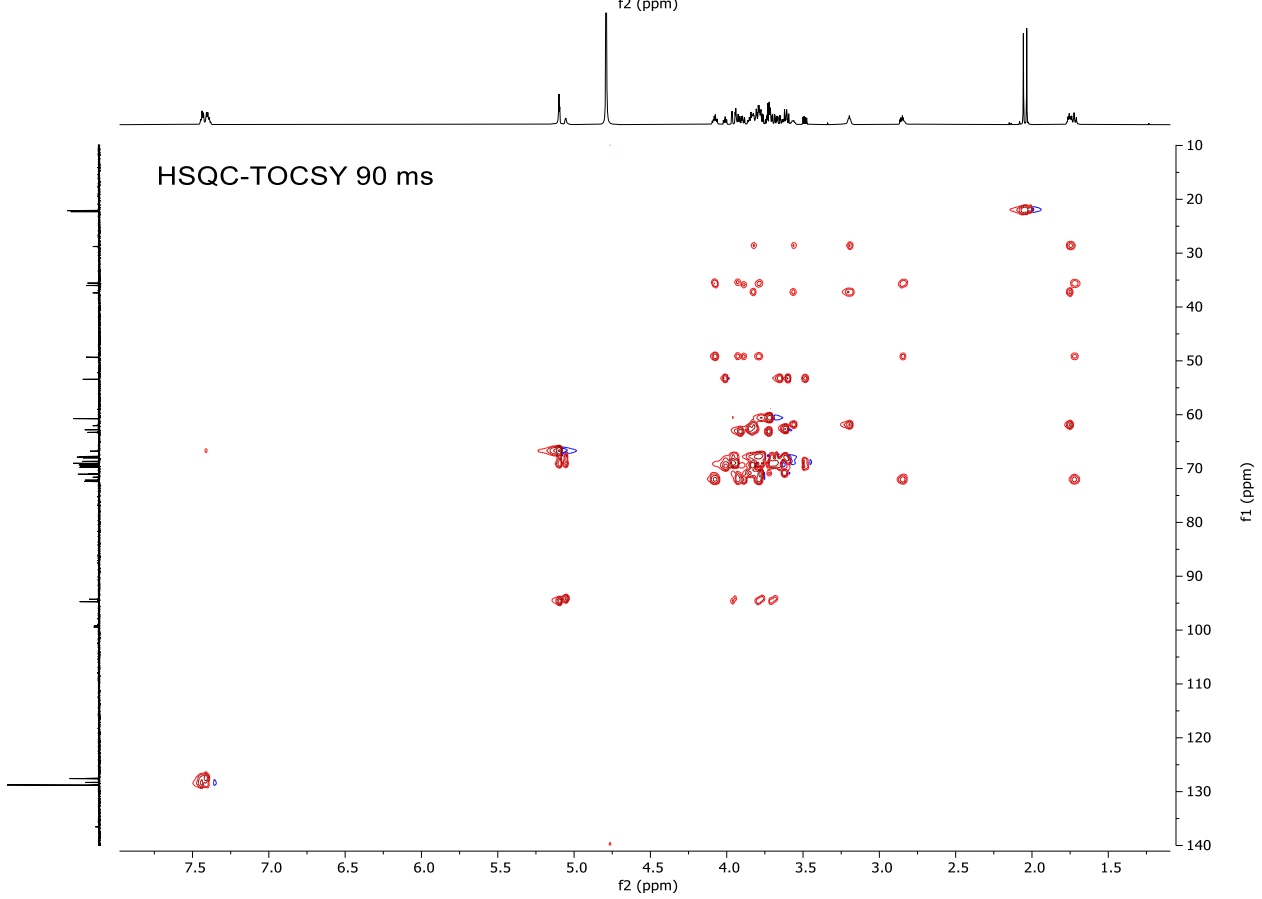

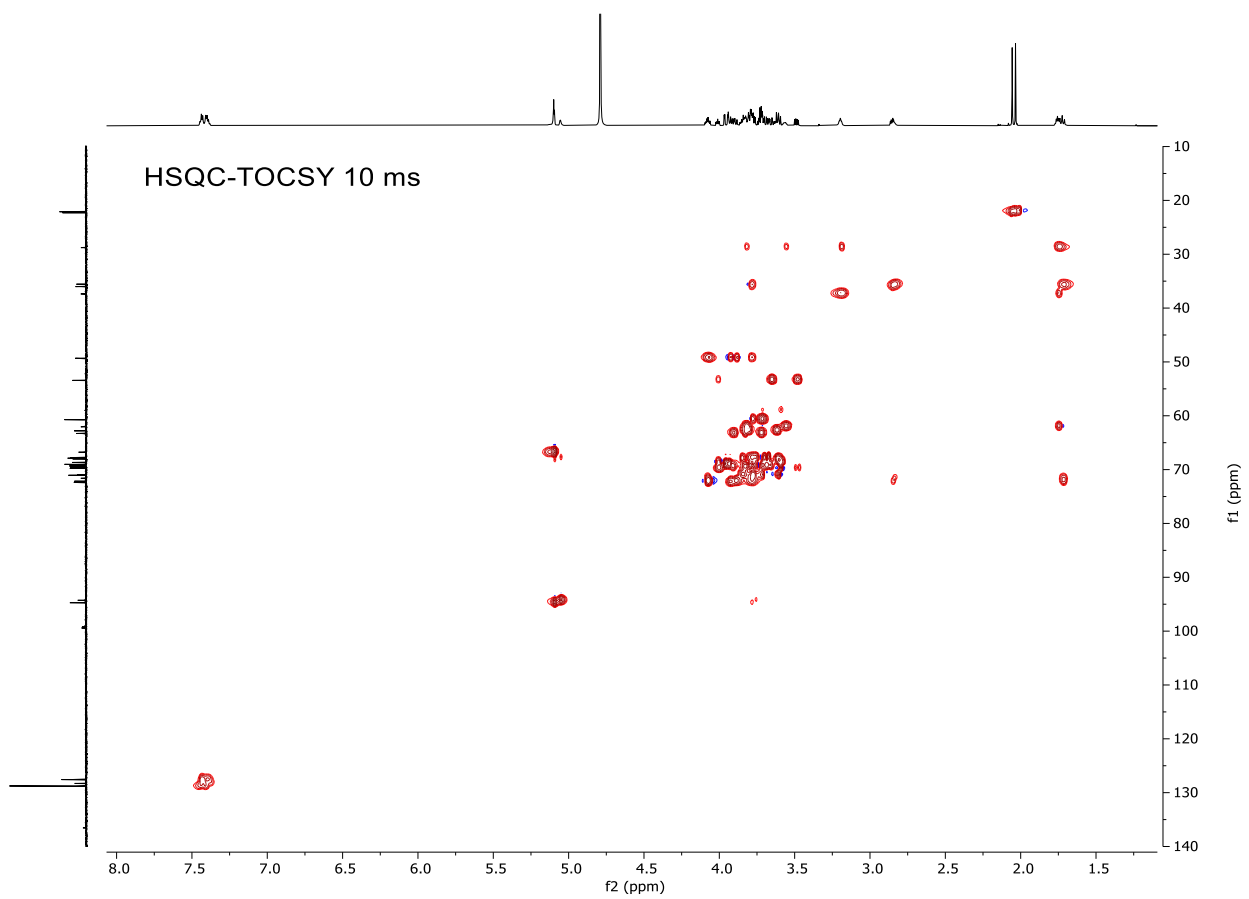



$^1\text{H}$  (800 MHz),  $^{13}\text{C}$  (200 MHz), HSQC (800 MHz), and HSQC-TOCSY (90 ms and 10 ms, 800 MHz) NMR spectra ( $\text{D}_2\text{O}$ ) of Gal $\alpha$ 1-4Neu5Ac9NAc $\alpha$ 2-6Gal $\alpha$ 1-4Neu5Ac $\alpha$ ProNHcbz (**9NAc-G4**)

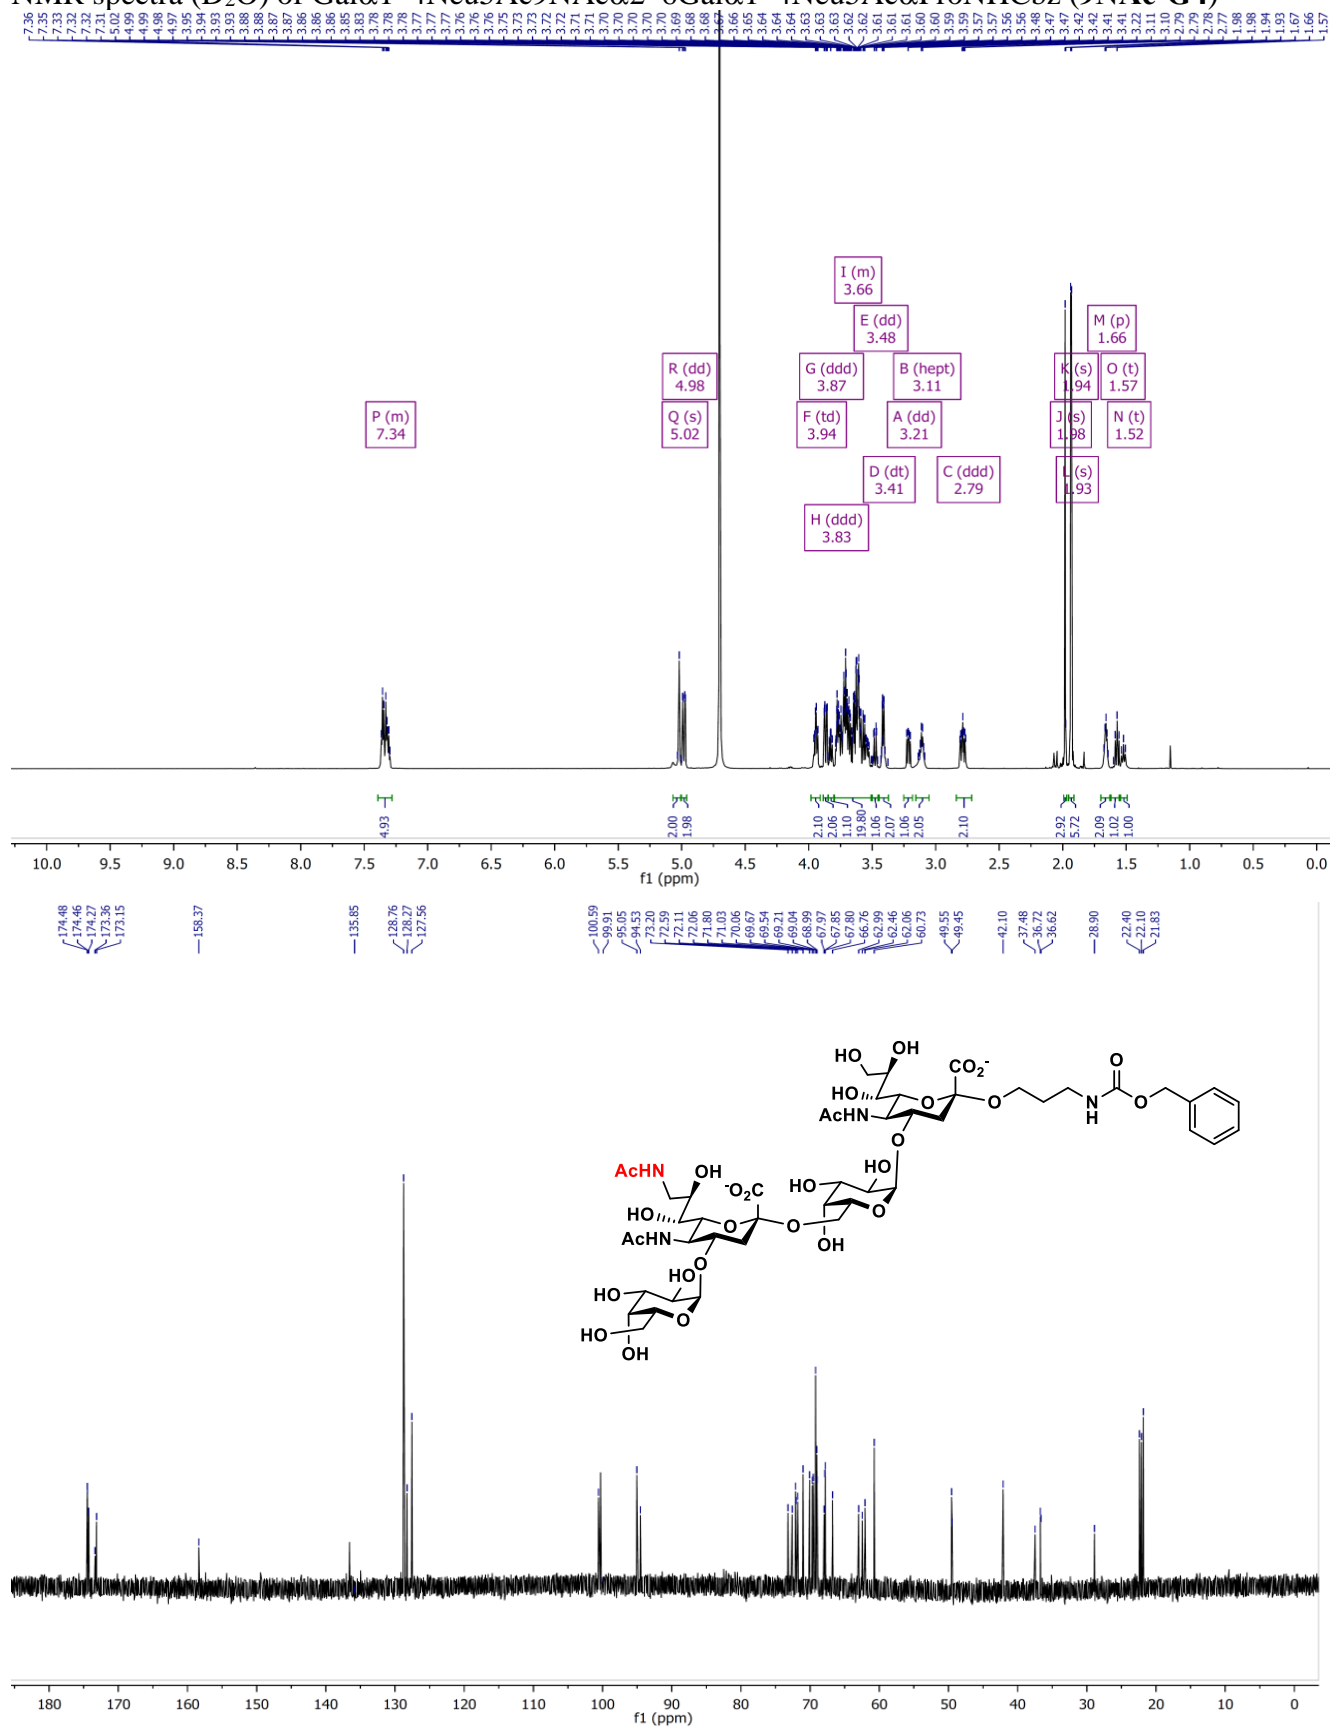

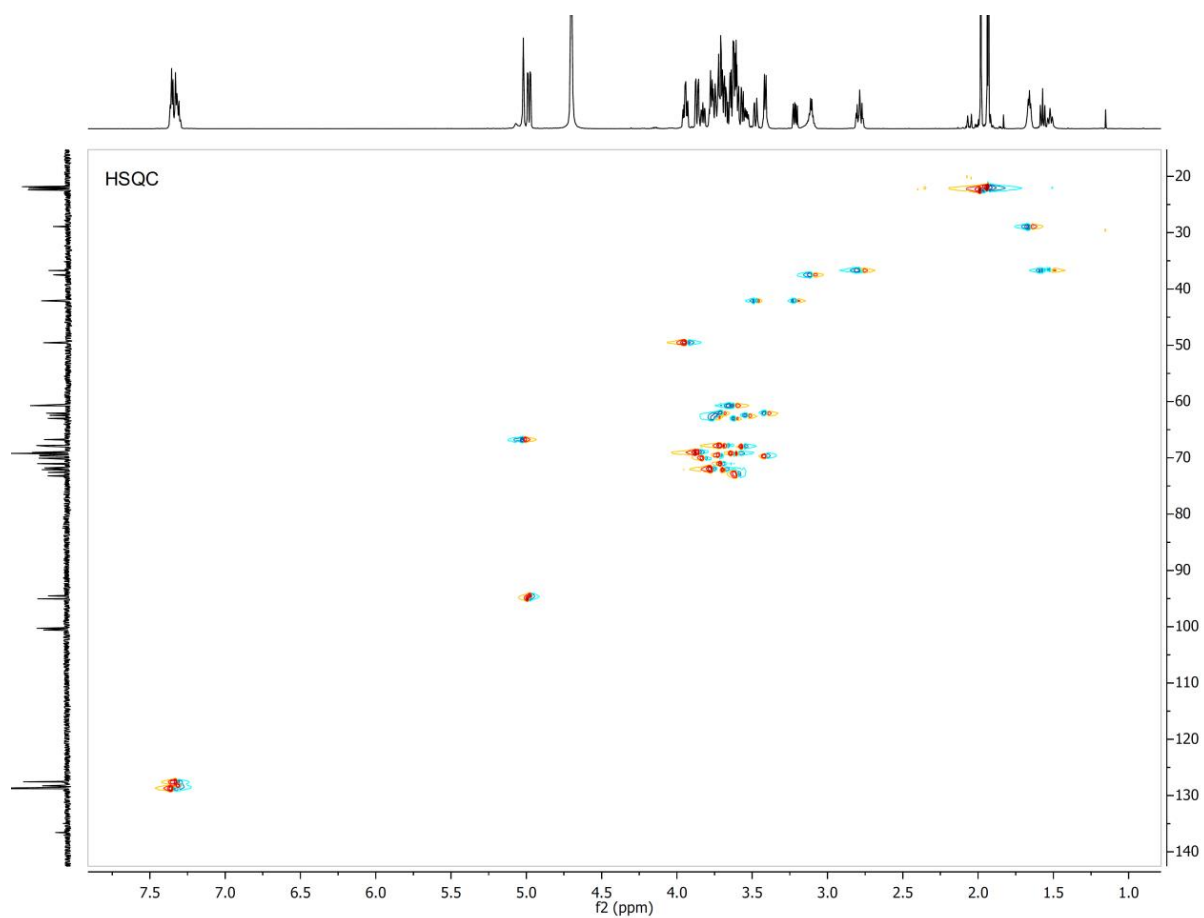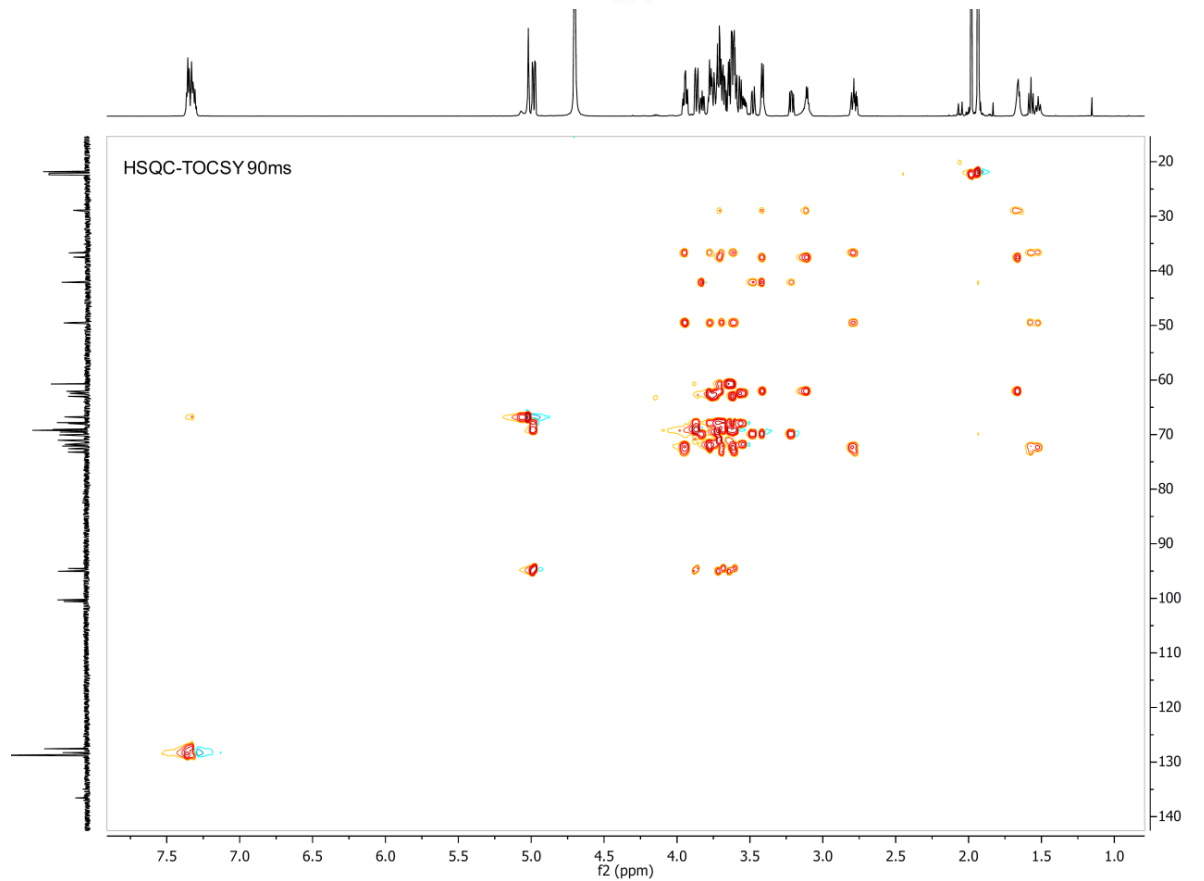

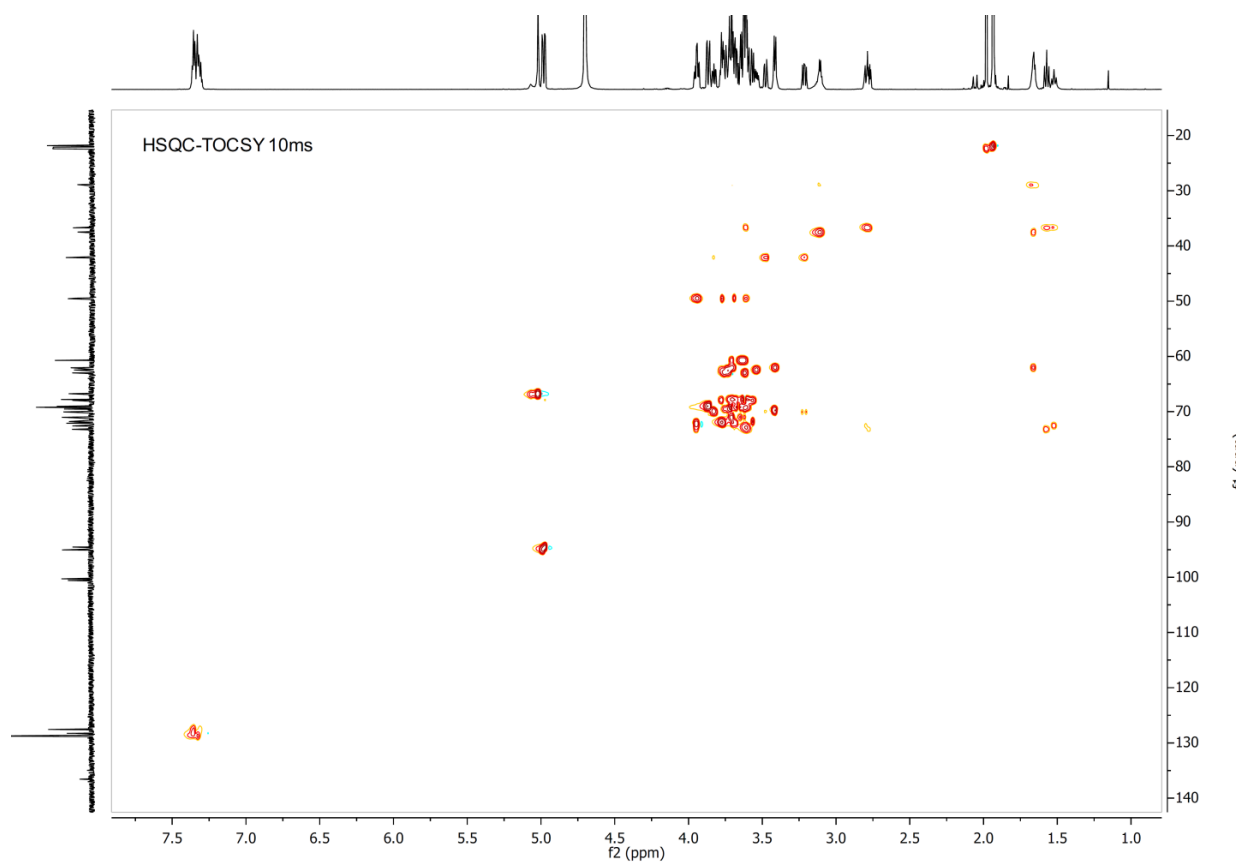

Supplement: NIHMS1659287-supplement-Supplementary_Material.pdf [file NIHMS1659287-supplement-Supplementary_Material.pdf]
